# Supplementary material for: PIWI–piRNA pathway-mediated transposable element repression in Hydra somatic stem cells
Source: PubMed Central journal article supplement — RNA. 2020 May;26(5):550–63. doi: 10.1261/rna.072835.119 (PMC7161359; doi:10.1261/rna.072835.119), 2020-05
Supplement: supp_072835.119_Supplemental_Analysis_Files_1_5.pdf [file supp_072835.119_Supplemental_Analysis_Files_1_5.pdf]

# 1 piRNA and Degradome Count Generation

*Bryan Teefy*

*12/20/2019*

## Load Required Libraries

```
library(dplyr)
library(reshape2)
library(ggplot2)
library(ggpubr)
```

## Classifying Transcripts in the *Hydra* Transcriptome

To determine the category of transcript to which piRNAs and degradome reads align, transcripts were classified as TEs, ncRNAs, uncharacterized transcripts, and genes.

The *Hydra* transcriptome was BLASTed against the *Hydra* Repbase, Swissprot, and nr databases with an e-value of 1e-5.

HMMER suite 3.1b2 (February 2015, <http://www.hmmerr.org/>) and Pfam v31.0 database were used to identify protein domains in the transcriptome using an e-value of 1e-6.

Uniprot protein descriptions were added to any transcripts that had a match in the Swissprot database using Uniprot's Retrieve ID/mapping tool (<https://www.uniprot.org/uploadlists/>).

Open reading frames were identified using Transdecoder.

Results are summarized in Table S1.

## Load Transcriptome Annotation Matrix

```
Transcript_Characterization <- read.table("objects/Transcriptome_Annotation_Matrix.txt",
  sep = "\t", check.names = FALSE, header = TRUE)
```

## Transposon Annotation

Transcripts that met the following criteria were classified as TEs:

Transcripts with significant similarities to entries in the Repbase database.

Transcripts with Swissprot protein descriptions or nr sequence descriptions containing the strings “transpos”, “J/jerky”, and “mobile element”.

Transcripts with Pfam domain descriptions predicted to encode domains containing “transposase”, “THAP”, “DDE\_Tnp”, “\_Tnp” or “tnp”.

## non-coding RNA (ncRNA) Annotation

We considered sequences non-coding RNAs if they were lacking TE annotation, Swissprot hit, nr hit, known PFAM domain, and an ORF equal to or greater than 100 amino acids. ORFs were predicted using Transdecoder using command `TransDecoder.LongOrfs -S -t`.

## Taxonomically Restricted Genes (TRGs)/Uncharacterized Genes

Uncharacterized Genes were defined as transcripts predicted to contain an ORF equal to or greater than 100 amino acids without a Swissprot Hit, nr hit, known domain, or TE annotation. Nr hits termed “uncharacterized protein” were also considered in this category.

## Gene Annotation

Genes were defined as transcripts with a Swissprot hit, nr hit, or domain annotation, and that were not classified as TEs by our annotation.

```
#Classify transcripts

Transcript_Characterization$Transcript_Class <- ifelse((

  !is.na(Transcript_Characterization$Rebase_Hit) | grepl("transpos"), Transcript_Characterization$Uni
  grepl("mobile element"), Transcript_Characterization$Uniprot_Description, ignore.case = TRUE) |
  grepl("jerky"), Transcript_Characterization$Uniprot_Description, ignore.case = TRUE) |
  grepl("transpos"), Transcript_Characterization$nr_Hit, ignore.case = TRUE) |
  grepl("mobile element"), Transcript_Characterization$nr_Hit, ignore.case = TRUE) |
  grepl("jerky"), Transcript_Characterization$nr_Hit, ignore.case = TRUE) |
  grepl("Transposase"), Transcript_Characterization$PFAM_Annotation, ignore.case = TRUE) |
  grepl("THAP"), Transcript_Characterization$PFAM_Annotation, ignore.case = TRUE) |
  grepl("_Tnp_"), Transcript_Characterization$PFAM_Annotation, ignore.case = TRUE) |
  grepl("DDE_Tnp"), Transcript_Characterization$PFAM_Annotation, ignore.case = TRUE) |
  grepl("_Tnp"), Transcript_Characterization$PFAM_Annotation, ignore.case = TRUE)), "TE",

  ifelse(is.na(Transcript_Characterization$ORF) & is.na(Transcript_Characterization$Uniprot_Descripti

  ifelse(!is.na(Transcript_Characterization$ORF) & is.na(Transcript_Characterization$Uniprot_Descrip

#Visualize Transcriptome Breakdown

transcriptome_annotation_whole <- c(sum(Transcript_Characterization$Transcript_Class == "TE"), sum(Trans

lbls <- c("TEs", "ncRNAs", "Unchar", "Genes")
colors = c("red", "blue", "gray", "green")
pct <- round(transcriptome_annotation_whole/sum(transcriptome_annotation_whole)*100)
lbls <- paste(lbls, pct) # add percents to labels
lbls <- paste(lbls, "%", sep="") # ad % to labels
pie(transcriptome_annotation_whole, labels = lbls, col=colors,
    main="Transcriptome Transcript Composition")
```

## Transcriptome Transcript Composition

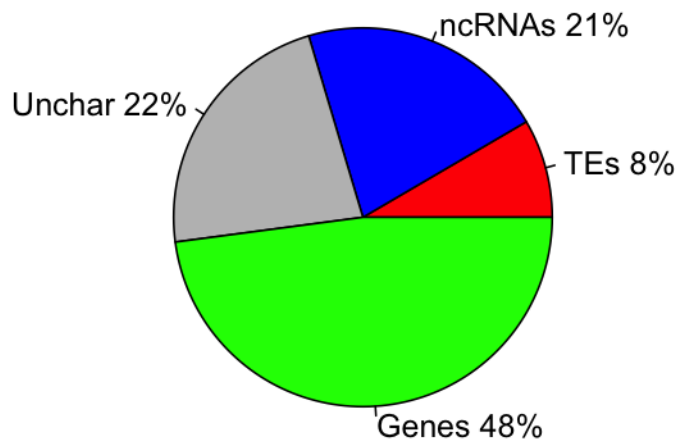

## Generating piRNA and Degradome counts

Since piRNAs are complementary to RNA transcript targets (antisense to the target) or derived directly from targets (sense to the target), we used piRNA mapping to identify these targets in the *Hydra* transcriptome.

Adapters were trimmed from the WT and Colchicine raw reads using the script `trimbioadapter.sh`.

piRNAs were mapped to the *Hydra* transcriptome with Bowtie v1.1.2 using the shell script: `piRNA_Deg_Mapping.sh`.

Three mismatches were allowed in the antisense orientation and no mismatches were allowed in the sense orientation. Degradome reads were mapped in the sense orientation with no mismatches since degradome reads are transcript fragments.

A count matrix consisting of the number of mapped piRNAs per transcript was generated using the script: `Counting_Matrix_Gen.R`.

Importantly this script apportioned multimapping piRNAs fractionally such that the count value for a particular piRNA mapping to a transcript was divided by the number of times the piRNA mapped to the transcriptome.

`Counting_Matrix_Gen.R` was run using the script: `run_Counting_Matrix_Gen.sh`.

Results are summarized in the table, “`piRNA_Counts_Matrix.txt`” and “`Degradome_Counts_Matrix.txt`”, which can be found in the GEO repository (GSE135440).

## Load and Merge the piRNA and Degradome Count Files

```
piRNA_counts <- read.table("objects/piRNA_Count_Matrix.txt", header = T)
Deg_counts <- read.table("objects/Deg_Count_Matrix.txt", header = T)
piRNA_Deg_counts <- merge(piRNA_counts, Deg_counts, by = "ID")
piRNA_Deg_counts <- merge(Transcript_Characterization, piRNA_Deg_counts, by = "ID")
```

## Generate Normalized piRNA Counts

PIWI targets should have a high density of piRNA counts. We normalize piRNA counts by transcript length to determine piRNA count density (Reads per kilobase [RPK]).

To determine if piRNA count density values were significantly different between classes of transcripts, we performed Tukey's Honest Significant Difference test to compare mean piRNA count density between each transcript type (i.e. TE, ncRNA, Unchar., Gene) for each piRNA class (i.e. Hywi Antisense-mapped, Hyli Sense-mapped).

```
# Generate RPK values
norm <- (piRNA_Deg_counts$Length/1000)
piRNA_Deg_counts[, c(22:31)] <- piRNA_Deg_counts[, c(12:21)]/norm
colnames(piRNA_Deg_counts)[22:31] <- c("WT_Hywi_AS_Counts_RPK", "WT_Hyli_AS_Counts_RPK",
  "WT_Hywi_S_Counts_RPK", "WT_Hyli_S_Counts_RPK", "Colch_Hywi_AS_Counts_RPK", "Colch_Hyli_AS_Counts_RPK",
  "Colch_Hywi_S_Counts_RPK", "Colch_Hyli_S_Counts_RPK", "WT_Deg_Counts_RPK", "Colch_Deg_Counts_RPK")

# Perform Tukey's Honest Significant Difference test

# Group normalized mapping counts
Normalized_Mapping_Counts_Matrix <- piRNA_Deg_counts[, c(22:29, 11)]
Normalized_Mapping_Counts_Matrix_Formatted <- melt(Normalized_Mapping_Counts_Matrix,
  id.var = "Transcript_Class")

# Subset count density based on piRNA origin
WT_Hyli_AS_Counts_Stats <- subset(Normalized_Mapping_Counts_Matrix_Formatted, variable ==
  "WT_Hyli_AS_Counts_RPK")
WT_Hyli_S_Counts_Stats <- subset(Normalized_Mapping_Counts_Matrix_Formatted, variable ==
  "WT_Hyli_S_Counts_RPK")
WT_Hywi_AS_Counts_Stats <- subset(Normalized_Mapping_Counts_Matrix_Formatted, variable ==
  "WT_Hywi_AS_Counts_RPK")
WT_Hywi_S_Counts_Stats <- subset(Normalized_Mapping_Counts_Matrix_Formatted, variable ==
  "WT_Hywi_S_Counts_RPK")

Colch_Hyli_AS_Counts_Stats <- subset(Normalized_Mapping_Counts_Matrix_Formatted,
  variable == "Colch_Hyli_AS_Counts_RPK")
Colch_Hyli_S_Counts_Stats <- subset(Normalized_Mapping_Counts_Matrix_Formatted, variable ==
  "Colch_Hyli_S_Counts_RPK")
```

```

Colch_Hywi_AS_Counts_Stats <- subset(Normalized_Mapping_Counts_Matrix_Formatted,
  variable == "Colch_Hywi_AS_Counts_RPK")
Colch_Hywi_S_Counts_Stats <- subset(Normalized_Mapping_Counts_Matrix_Formatted, variable ==
  "Colch_Hywi_S_Counts_RPK")

# Develop Tukey Test Function (ANOVA post hoc test)

Tukey_Test <- function(x) {
  res.aov <- aov(value ~ Transcript_Class, data = x)
  return(TukeyHSD(res.aov))
}

# Run Tukey Test

Tukey_Test(WT_Hyli_AS_Counts_Stats)

## Tukey multiple comparisons of means
## 95% family-wise confidence level
##
## Fit: aov(formula = value ~ Transcript_Class, data = x)
##
## $Transcript_Class
##          diff          lwr          upr          p adj
## ncRNA-Gene    676.8018    411.99715    941.60647 0.0000000
## TE-Gene       2367.7919   1988.36297   2747.22084 0.0000000
## Unchar-Gene    320.8933     61.26345    580.52305 0.0081561
## TE-ncRNA      1690.9901   1277.40463   2104.57557 0.0000000
## Unchar-ncRNA  -355.9086    -663.30774   -48.50937 0.0155491
## Unchar-TE     -2046.8987   -2457.19010 -1636.60722 0.0000000

Tukey_Test(WT_Hyli_S_Counts_Stats)

## Tukey multiple comparisons of means
## 95% family-wise confidence level
##
## Fit: aov(formula = value ~ Transcript_Class, data = x)
##
## $Transcript_Class
##          diff          lwr          upr          p adj
## ncRNA-Gene    641.7496    326.2192    957.2800 0.0000010
## TE-Gene       3136.1628   2684.0509   3588.2748 0.0000000
## Unchar-Gene   1133.4406    824.0764   1442.8048 0.0000000
## TE-ncRNA      2494.4132   2001.6017   2987.2247 0.0000000
## Unchar-ncRNA  491.6910    125.4067    857.9753 0.0031614
## Unchar-TE    -2002.7222   -2491.6087 -1513.8358 0.0000000

Tukey_Test(WT_Hywi_AS_Counts_Stats)

## Tukey multiple comparisons of means
## 95% family-wise confidence level
##
## Fit: aov(formula = value ~ Transcript_Class, data = x)
##
## $Transcript_Class
##          diff          lwr          upr          p adj

```

```
## ncRNA-Gene      550.6539   412.623440   688.6844 0.0000000
## TE-Gene         2456.9401  2259.161224  2654.7189 0.0000000
## Unchar-Gene     719.4290   584.095902   854.7620 0.0000000
## TE-ncRNA        1906.2861  1690.703074  2121.8692 0.0000000
## Unchar-ncRNA    168.7750     8.542001    329.0081 0.0343943
## Unchar-TE       -1737.5111 -1951.377135 -1523.6451 0.0000000
```

Tukey\_Test(WT\_Hywi\_S\_Counts\_Stats)

```
## Tukey multiple comparisons of means
## 95% family-wise confidence level
##
## Fit: aov(formula = value ~ Transcript_Class, data = x)
##
## $Transcript_Class
##          diff          lwr          upr          p adj
## ncRNA-Gene  15.47210 -22.13980  53.08400 0.7158328
## TE-Gene     357.69360 303.80088  411.58633 0.0000000
## Unchar-Gene  31.34943  -5.52745  68.22632 0.1276507
## TE-ncRNA    342.22150 283.47731  400.96570 0.0000000
## Unchar-ncRNA 15.87733  -27.78454  59.53921 0.7864508
## Unchar-TE   -326.34417 -384.62049 -268.06785 0.0000000
```

Tukey\_Test(Colch\_Hyli\_AS\_Counts\_Stats)

```
## Tukey multiple comparisons of means
## 95% family-wise confidence level
##
## Fit: aov(formula = value ~ Transcript_Class, data = x)
##
## $Transcript_Class
##          diff          lwr          upr          p adj
## ncRNA-Gene  380.7634   256.5542  504.972613 0.0000000
## TE-Gene     1406.5476 1228.5728 1584.522493 0.0000000
## Unchar-Gene  226.6174   104.8355  348.399343 0.0000104
## TE-ncRNA    1025.7842  831.7879 1219.780568 0.0000000
## Unchar-ncRNA -154.1460  -298.3346  -9.957341 0.0306720
## Unchar-TE   -1179.9302 -1372.3814 -987.478957 0.0000000
```

Tukey\_Test(Colch\_Hyli\_S\_Counts\_Stats)

```
## Tukey multiple comparisons of means
## 95% family-wise confidence level
##
## Fit: aov(formula = value ~ Transcript_Class, data = x)
##
## $Transcript_Class
##          diff          lwr          upr          p adj
## ncRNA-Gene  17.99663  -72.48296  108.4762 0.9565031
## TE-Gene     767.67172 638.02683  897.3166 0.0000000
## Unchar-Gene 189.64385 100.93243  278.3553 0.0000002
## TE-ncRNA    749.67509 608.35945  890.9907 0.0000000
## Unchar-ncRNA 171.64722  66.61376  276.6807 0.0001578
## Unchar-TE   -578.02788 -718.21800 -437.8377 0.0000000
```

Tukey\_Test(Colch\_Hywi\_AS\_Counts\_Stats)

```
## Tukey multiple comparisons of means
## 95% family-wise confidence level
##
## Fit: aov(formula = value ~ Transcript_Class, data = x)
##
## $Transcript_Class
##          diff          lwr          upr          p adj
## ncRNA-Gene    522.48515    268.8335    776.1368 0.0000007
## TE-Gene       3389.43088   3025.9827   3752.8791 0.0000000
## Unchar-Gene    492.18109    243.4863    740.8758 0.0000022
## TE-ncRNA      2866.94573   2470.7796   3263.1119 0.0000000
## Unchar-ncRNA  -30.30407   -324.7563    264.1481 0.9935328
## Unchar-TE     -2897.24979  -3290.2606  -2504.2390 0.0000000
```

```
Tukey_Test(Colch_Hywi_S_Counts_Stats)
```

```
## Tukey multiple comparisons of means
## 95% family-wise confidence level
##
## Fit: aov(formula = value ~ Transcript_Class, data = x)
##
## $Transcript_Class
##          diff          lwr          upr          p adj
## ncRNA-Gene   -70.675926  -129.30100  -12.050851 0.0105377
## TE-Gene       171.966758    87.96503   255.968488 0.0000009
## Unchar-Gene  -67.337842  -124.81725   -9.858429 0.0139294
## TE-ncRNA      242.642684   151.07904   334.206327 0.0000000
## Unchar-ncRNA   3.338085   -64.71699    71.393157 0.9992856
## Unchar-TE    -239.304599  -330.13898  -148.470222 0.0000000
```

## Visualizing piRNA Mapping

Since the range of observed count density values was large, we used a log scale to visualize piRNA count density. For boxplot visualization, we added a pseudocount to the raw piRNA counts to remove any 0 count density values that would return infinite values on a log scale. The pseudocount we chose was 0.001 since that approximated the lowest fractional count used in our counting strategy. We explored piRNA count density for 1) Whole animals and 2) Epithelial Animals.

```
# Set pseudocount

pseudocount <- 0.001

# Add pseudocount to raw piRNA counts then generate piRNA count density values

boxplot_matrix <- piRNA_Deg_counts[, c(12:19, 3, 11)]
boxplot_matrix[, c(1:8)] <- boxplot_matrix[, c(1:8)] + pseudocount
boxplot_matrix[, c(1:8)] <- boxplot_matrix[, c(1:8)]/(boxplot_matrix$Length/1000)

# Plot whole animal piRNA count density values

wt_matrix_data <- boxplot_matrix[, c(10, 1:4)]
wt_matrix_data_formatted <- melt(wt_matrix_data, id.var = "Transcript_Class")
colnames(wt_matrix_data_formatted) <- c("Transcript_Class", "piRNA-Origin", "piRNA-Mapping-Density")
wt_matrix_data_formatted$Transcript_Class <- factor(wt_matrix_data_formatted$Transcript_Class,
```

```

levels = c("TE", "ncRNA", "Unchar", "Gene"))

WT_level_order <- c("WT_Hywi_AS_Counts", "WT_Hywi_S_Counts", "WT_Hyli_AS_Counts",
"WT_Hyli_S_Counts")

WT_boxplot <- ggplot(data = wt_matrix_data_formatted, aes(x = factor(piRNA_Origin,
level = WT_level_order), y = piRNA_Mapping_Density), log = "y") + geom_boxplot(aes(fill = Transcript
scale_y_log10(breaks = scales::trans_breaks("log10", function(x) 10^x), labels = scales::trans_form
scales::math_format(10^.x)))

WT_boxplot + scale_fill_manual(values = c("red", "light blue", "grey", "green")) +
theme(panel.grid.major = element_blank(), panel.grid.minor = element_blank(),
panel.background = element_blank(), axis.line = element_line(colour = "black")) +
theme(legend.text = element_text(size = rel(1))) + ggtitle("Whole Animal piRNA Mapping Density") +
theme(plot.title = element_text(hjust = 0.5)) + xlab("piRNA Origin") + ylab("piRNA Mapping Density

```

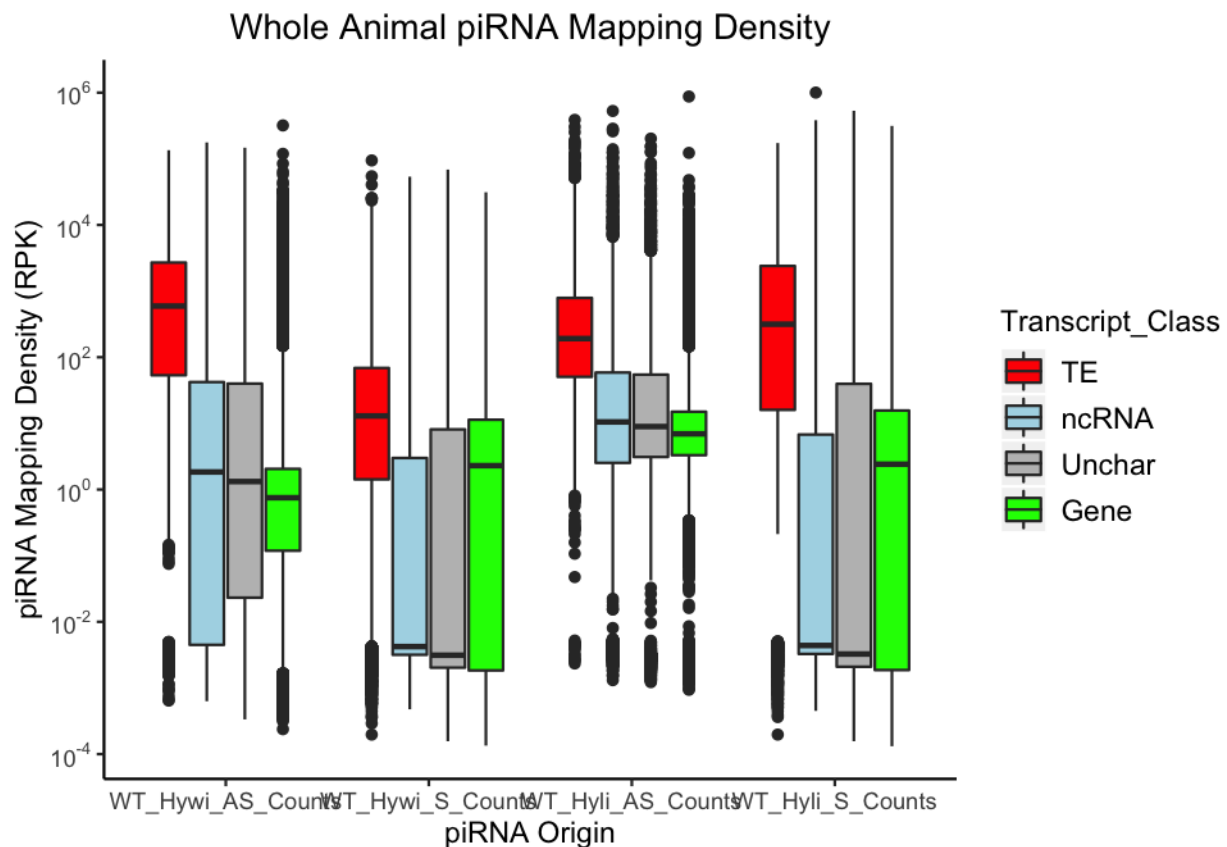

```

# Plot epithelial animal piRNA count density values

colch_matrix_data <- boxplot_matrix[, c(10, 5:8)]
colch_matrix_data_formatted <- melt(colch_matrix_data, id.var = "Transcript_Class")
colnames(colch_matrix_data_formatted) <- c("Transcript_Class", "piRNA_Origin", "piRNA_Mapping_Density")
colch_matrix_data_formatted$Transcript_Class <- factor(colch_matrix_data_formatted$Transcript_Class,
levels = c("TE", "ncRNA", "Unchar", "Gene"))

colch_level_order <- c("Colch_Hywi_AS_Counts", "Colch_Hywi_S_Counts", "Colch_Hyli_AS_Counts",
"Colch_Hyli_S_Counts")

```



```
colch_boxplot <- ggplot(data = colch_matrix_data_formatted, aes(x = factor(piRNA_Origin,
  level = colch_level_order), y = piRNA_Mapping_Density), log = "y") + geom_boxplot(aes(fill = Transc:
  scale_y_log10(breaks = scales::trans_breaks("log10", function(x) 10^x), labels = scales::trans_forma
  scales::math_format(10^.x)))

colch_boxplot + scale_fill_manual(values = c("red", "light blue", "grey", "green")) +
  theme(panel.grid.major = element_blank(), panel.grid.minor = element_blank(),
  panel.background = element_blank(), axis.line = element_line(colour = "black")) +
  theme(legend.text = element_text(size = rel(1))) + ggtitle("Somatic piRNA Mapping Density") +
  theme(plot.title = element_text(hjust = 0.5)) + xlab("piRNA Origin") + ylab("piRNA Mapping Density")
```

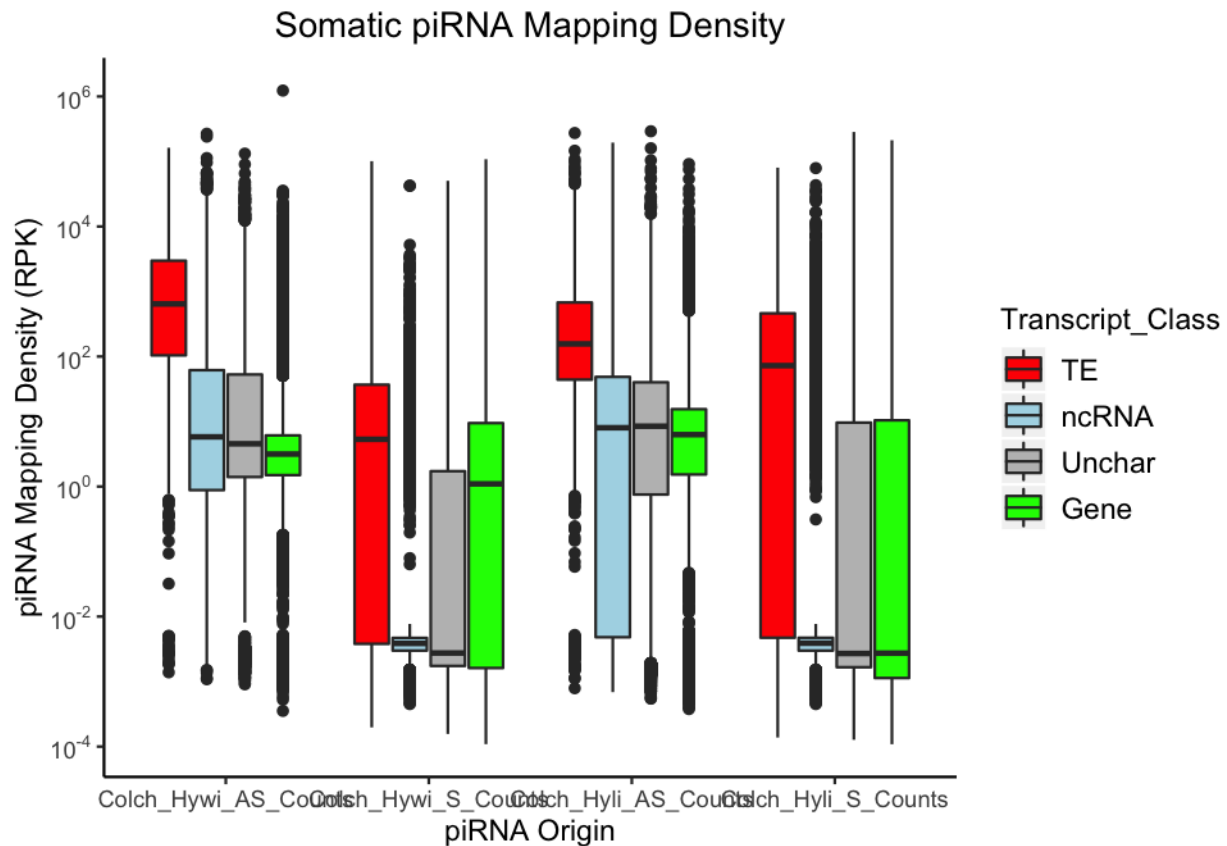

```
# write table that summarizes results write.table(piRNA_Deg_counts, file =
# 'objects/Annotated_piRNA_Degradome_Count_Matrix.txt', sep = '\t')
```

## Assessing piRNA Origin

piRNAs can be derived from distinct genomic loci, such as dedicated piRNA clusters, or from antisense transcription. If piRNAs are derived from antisense transcription, piRNAs should map to such targets in the *Hydra* transcriptome in the antisense orientation without mismatches. However, if piRNAs are generated from distinct genomic loci, it is likely that piRNAs will align to their targets with mismatches.

To address this distinction, we mapped piRNAs in the antisense orientation without mismatches to the *Hydra* transcriptome using the script: `No_mismatch_mapping.sh`

The script "piRNA\_stats.sh" was used to calculate the total number of aligned piRNAs with and without

mismatches. The results showed that 68.0% of piRNAs isolated from WT animals and 85.1% of piRNAs isolated from epithelial animals mapped with at least one mismatch. This indicates that the majority of piRNAs are derived from a locus distinct from the target transcript.

## Software versions

This document was computed on Thu Jan 09 15:18:14 2020 with the following R package versions.

R version 3.5.3 (2019-03-11)

Platform: x86\_64-apple-darwin15.6.0 (64-bit)

Running under: macOS Mojave 10.14.5

Matrix products: default

BLAS: /Library/Frameworks/R.framework/Versions/3.5/Resources/lib/libRblas.0.dylib

LAPACK: /Library/Frameworks/R.framework/Versions/3.5/Resources/lib/libRlapack.dylib

locale:

[1] en\_US.UTF-8/en\_US.UTF-8/en\_US.UTF-8/C/en\_US.UTF-8/en\_US.UTF-8

attached base packages:

[1] stats graphics grDevices utils datasets methods base

other attached packages:

[1] ggpubr\_0.2.4 magrittr\_1.5 ggplot2\_3.2.0 reshape2\_1.4.3

[5] dplyr\_0.8.3 knitr\_1.22

loaded via a namespace (and not attached):

[1] Rcpp\_1.0.1 munsell\_0.5.0 tidyselect\_0.2.5 colorspace\_1.4-1  
[5] R6\_2.4.0 rlang\_0.4.0 stringr\_1.4.0 plyr\_1.8.4  
[9] tools\_3.5.3 grid\_3.5.3 gtable\_0.3.0 xfun\_0.5  
[13] withr\_2.1.2 htmltools\_0.3.6 lazyeval\_0.2.2 yaml\_2.2.0  
[17] assertthat\_0.2.1 digest\_0.6.20 tibble\_2.1.3 ggsignif\_0.5.0  
[21] crayon\_1.3.4 purrr\_0.3.2 formatR\_1.7 glue\_1.3.1  
[25] evaluate\_0.13 rmarkdown\_1.12 stringi\_1.4.3 compiler\_3.5.3  
[29] pillar\_1.4.2 scales\_1.0.0 pkgconfig\_2.0.2

# 2 Differential Gene Expression Analysis and GO Enrichment

*Stefan Siebert and Bryan Teefy*

*12/20/2019*

## Differential Gene Expression

We performed differential gene expression analysis between wildtype and *hywi* knockdown animals. As a first step we generated expression estimates using RSEM/bowtie and used reads that were filtered for adapters (TruSeq3) using trimmomatic (LEADING:3 TRAILING:3 SLIDINGWINDOW:4:15 MINLEN:36). We made use of the RSEM functions `rsem-calculate-expression` (`-forward-prob 0`) and `rsem-generate-data-matrix` to generate an expression matrix (scripts: `DGE_expression.sh`, `DGE_count_matrix.sh`). The raw count matrix is available at GEO (GSE135440).

## Load the expression data / GO annotations

```
# Load the Differential Gene Expression Count Matrix

counts <- read.table("objects/Differential_Gene_Expression_Count_Matrix.txt", sep = "\t",
  check.names = FALSE, header = TRUE, row.names = 1)

# Load normalized piRNA and degradome reads and transcript characterization from
# RMD1

piRNA_Deg_counts <- read.table("objects/Annotated_piRNA_Degradome_Count_Matrix.txt",
  sep = "\t")
```

## Load Required Packages

```
library(edgeR)
library(knitr)
library(xtable)
library(ggplot2)
```

## Data exploration

We explore the data to get insights into the paired nature of the triplicate samples from wildtype and *hywi* knockdown tissue.

```
# We first calculate normalized counts for future use and to include them in the
# master dataframe.

# set gene IDs as rownames
rownames(counts) <- counts[, 1]
```

```

# raw counts from all treatments
k <- counts[, c(2:7)]

# calculate normalization factors
nf_k <- calcNormFactors(k)

# calculate library sizes
ls_k <- colSums(k)

# effective library size using normalization factors
lse_k <- ls_k * nf_k

# normalization multiplier to use on counts
nm_k <- 1e+06/lse_k

# normalize counts using normalization multiplier
k <- k * nm_k

# round normalized counts
k <- round(k, digits = 0)

# restore ID column
k$ID <- rownames(k)

# reorder columns
k <- k[, c(7, 1:6)]

# combine rounded raw and normalized counts
k <- merge(counts[, c(1:7)], k, by = "ID")

# rename columns
colnames(k) <- c("ID", "WT1", "WT2", "WT3", "KD1", "KD2", "KD3", "nWT1", "nWT2",
  "nWT3", "nKD1", "nKD2", "nKD3")

# explore replication

# define treatment groups for DGE
TR_k <- factor(c("k", "k", "k", "w", "w", "w"))

# set wild type as reference
TR_k <- relevel(TR_k, ref = "w")

# create experimental design data frame defining treatment type for each sample
d_k <- data.frame(Sample = colnames(counts[, c(5, 6, 7, 2, 3, 4)]), TR_k)

# generate DGEList object containing raw counts, the treatment type for each
# column, and the gene IDs
y <- DGEList(counts = counts[, c(5, 6, 7, 2, 3, 4)], group = d_k$TR_k, genes = counts[,
  1])

# label each column with the appropriate sample name
colnames(y) <- d_k$Sample

```

```

# calculate library size for each sample and store within DGEList
y$samples$lib.size <- colSums(y$counts)

# exclude transcripts that do not have at least two samples with more than one
# count per million
keep <- rowSums(cpm(y) > 1) >= 2
y <- y[keep, , keep.lib.sizes = FALSE]

# number of transcripts remaining after count filtering
dim(y)

## [1] 16435      6

# calculate normalization factors for each sample
y <- calcNormFactors(y)

# review library sizes and normalization factors
y$samples

##      group lib.size norm.factors
## KD1      k 27236412   1.0711124
## KD2      k 26955915   0.9927897
## KD3      k 27081381   1.0126300
## WT1      w 22165507   1.0181741
## WT2      w 27471090   0.9836625
## WT3      w 25597005   0.9272326

# create a matrix defining the control and treatment groups for the analysis
# based on what is described by the TR object
design_k <- model.matrix(~TR_k)

# Estimate dispersions
y <- estimateDisp(y, design_k)

# generate MDS Plot

plotMDS(y, method = "bcv", cex = 0.7)

```

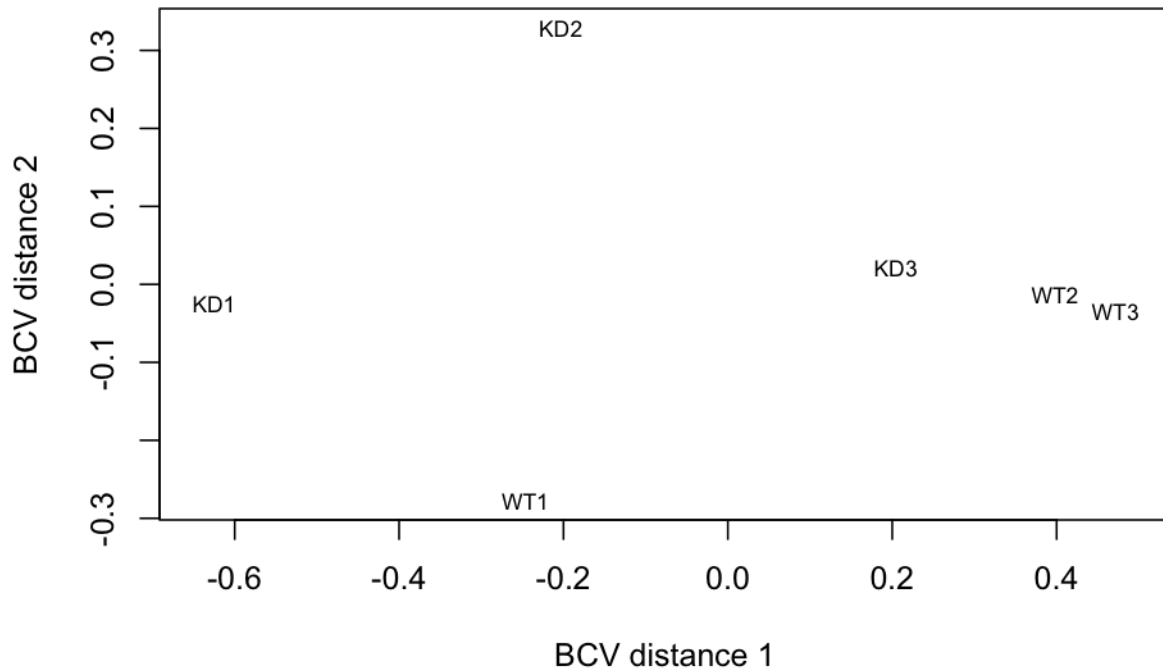

```

# we exclude outlier replicates WT1 and KD3 from downstream analyses

# define treatment groups for DGE
TR_k <- factor(c("k", "k", "w", "w"))

# set wild type as reference
TR_k <- relevel(TR_k, ref = "w")

# create experimental design data frame defining treatment type for each sample
d_k <- data.frame(Sample = colnames(counts[, c(5, 6, 3, 4)]), TR_k)

# generate DGEList object containing raw counts, the treatment type for each
# column, and the gene annotations
y <- DGEList(counts = counts[, c(5, 6, 3, 4)], group = d_k$TR_k, genes = counts[,
  1])

# label each column with the appropriate sample name
colnames(y) <- d_k$Sample

# calculate library size for each sample and store within DGEList
y$samples$lib.size <- colSums(y$counts)

# exclude transcripts that do not have at least two samples with more than one
# count per million
keep <- rowSums(cpm(y) > 1) >= 2
y <- y[keep, , keep.lib.sizes = FALSE]

```

```

# number of transcripts remaining after count filtering
dim(y)

## [1] 15924      4

# calculate normalization factors for each sample
y <- calcNormFactors(y)

# review library sizes and normalization factors
y$samples

##      group lib.size norm.factors
## KD1      k 27217655  1.0849445
## KD2      k 26945252  0.9960237
## WT2      w 27460768  0.9922666
## WT3      w 25588479  0.9325978

# create a matrix defining the control and treatment groups for the analysis
# based on what is described by the TR object
design_k <- model.matrix(~TR_k)

# estimate dispersions
y <- estimateDisp(y, design_k)

# generate MDS Plot
plotMDS(y, method = "bcv", cex = 0.7)

```

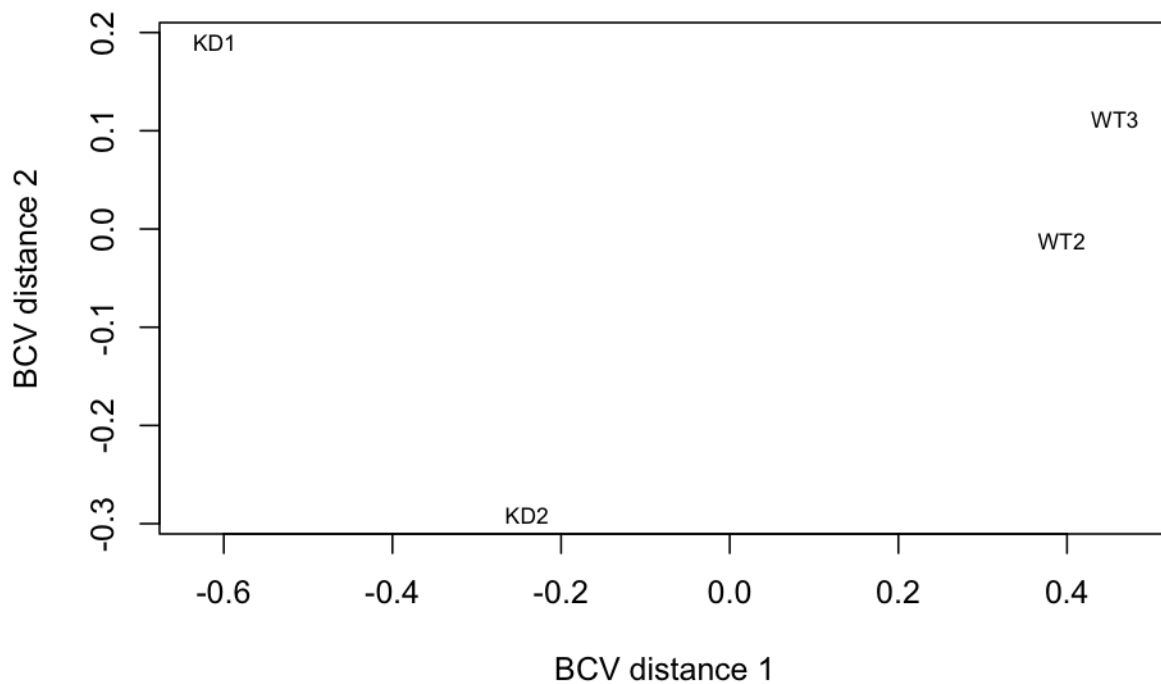

## Differential Gene Expression (DGE) analysis - wildtype vs *hywi* knockdown

We perform DGE analysis after excluding outlier replicates WT1 and KD3.

```
# DGE Analysis

# set p-value for cutoff
p.value = 0.05

# fit data to a negative binomial generalized log-linear model
fit_k <- glmFit(y, design_k)

# conduct a statistical test for differential gene expression based on the fit
# from
lrt_k <- glmLRT(fit_k)

# create a list of values that describes the status of each gene in the DGE test
de_k <- decideTestsDGE(lrt_k, adjust.method = "BH", p.value)

# overview of number of differentially expressed genes
summary(de_k)

##          TR_kk
## Down         17
## NotSig 15466
## Up           441

# build results table
D_k <- lrt_k$table

# restore ID column
D_k$ID <- rownames(D_k)

# add column of adjusted p values
D_k <- cbind(D_k, p.adjust(D_k$PValue, method = "BH"))
names(D_k)[names(D_k) == "p.adjust(D_k$PValue, method = \"BH\")"] = "k_Padj"

# create table summarizing rounded raw counts, normalized counts and DGE results
res_k <- merge(k, D_k, by = "ID", all = TRUE)

# call transcripts upregulated, downregulated, or unaffected
res_k$DE <- ifelse(res_k$k_Padj <= 0.05 & res_k$logFC >= 0 & !is.na(res_k$logFC &
  res_k$k_Padj), "Up", ifelse(res_k$k_Padj <= 0.05 & res_k$logFC <= 0 & !is.na(res_k$logFC &
  res_k$k_Padj), "Down", "None"))

# merge with the master dataframe
piRNA_Deg_counts <- merge(piRNA_Deg_counts, res_k, by = "ID")

# generate volcano plot
detags <- rownames(y)[as.logical(de_k)]
```



```
plotSmear(lrt_k, de.tags = detags, cex = 0.2, cex.lab = 1, cex.axis = 1)
```

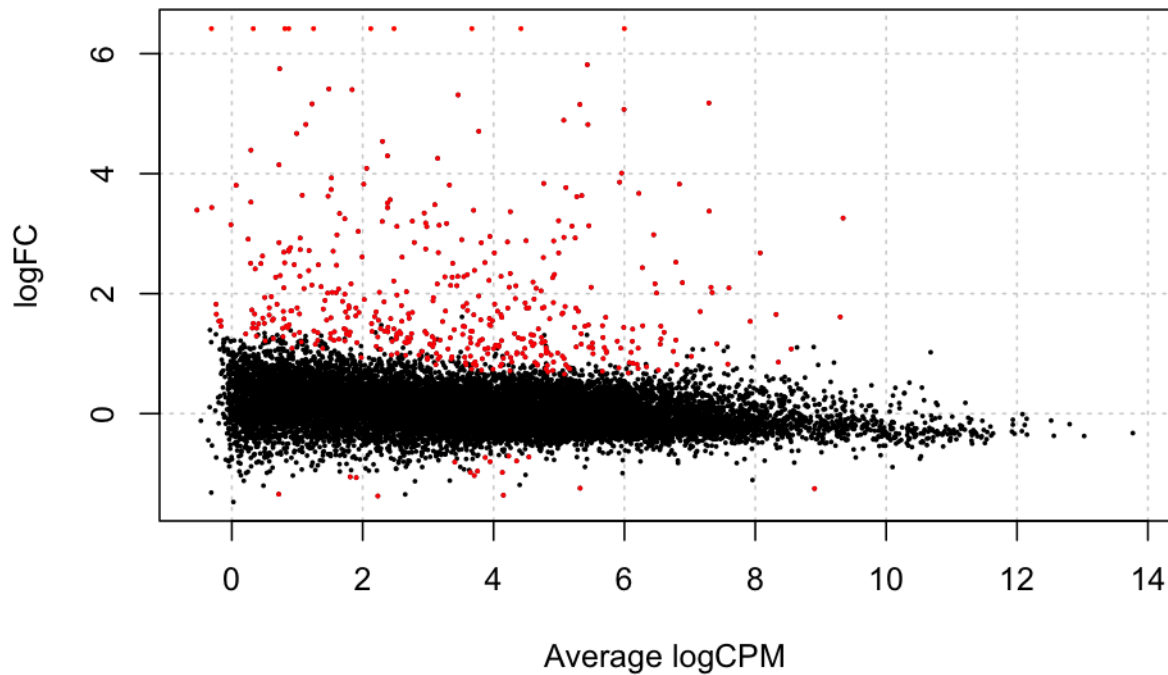

```
# generate plot of upregulated transcripts expression fold change
```

```
Upreg_Types <- c(sum(piRNA_Deg_counts$DE == "Up" & piRNA_Deg_counts$Transcript_Class ==  
  "TE"), sum(piRNA_Deg_counts$DE == "Up" & piRNA_Deg_counts$Transcript_Class ==  
  "ncRNA"), sum(piRNA_Deg_counts$DE == "Up" & piRNA_Deg_counts$Transcript_Class ==  
  "Unchar"), sum(piRNA_Deg_counts$DE == "Up" & piRNA_Deg_counts$Transcript_Class ==  
  "Gene"))
```

```
lbls <- c("TEs", "ncRNAs", "Unchar", "Genes")
```

```
colors = c("red", "blue", "gray", "green")
```

```
pct <- round(Upreg_Types/sum(Upreg_Types) * 100)
```

```
lbls <- paste(lbls, pct) # add percents to labels
```

```
lbls <- paste(lbls, "%", sep = "") # ad % to labels
```

```
pie(Upreg_Types, labels = lbls, col = colors, main = "hywi RNAi Upregulated Transcript Composition")
```

## hywi RNAi Upregulated Transcript Composition

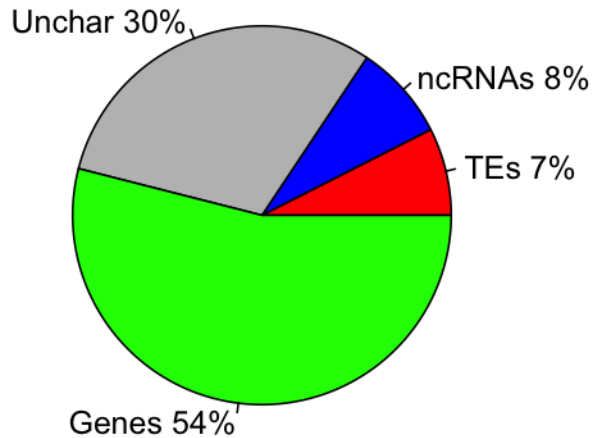

## Somatic Hywi piRNA Mapping Density Ordering

To infer direct targets of Hywi, *hywi* RNAi upregulated transcripts can be described as high and low Hywi piRNA mapping transcripts. “High-mapping” transcripts are likely to be direct Hywi targets while “low-mapping” transcripts are unlikely to be direct Hywi targets. High Mapping transcripts were defined as those transcripts that were in the top 20% of read counts per kilobase million after combining Colch Hywi Sense and Colch Hywi Antisense reads.

To infer which transcripts were most likely to be involved in the ping-pong cycle in somatic stem cells, transcripts were ordered by Colch Hywi Antisense reads per kilobase million. Transcripts that fall within the top 20% in this category were considered to be putative ping-pong transcripts.

To infer which transcripts may be processed by Hywi phasing in somatic stem cells, transcripts were ordered by Colch Hywi Sense reads per kilobase million. Transcripts that fall within the top 20% in this category were considered to be putative phased transcripts.

The same process was performed for Hyli piRNAs.

```
# Generate percentiles for the different groups
```

```
piRNA_Deg_counts$Somatic_Hywi_Perc <- (piRNA_Deg_counts$Colch_Hywi_AS_Counts_RPK +  
  piRNA_Deg_counts$Colch_Hywi_S_Counts_RPK)
```

```
piRNA_Deg_counts$Somatic_Hywi_Perc <- ecdf(piRNA_Deg_counts$Somatic_Hywi_Perc)(piRNA_Deg_counts$Somatic
```

```
# Repeat for only Colch Hywi Antisense piRNAs
```

```

piRNA_Deg_counts$Somatic_Hywi_Perc_AS <- (piRNA_Deg_counts$Colch_Hywi_AS_Counts_RPK)

piRNA_Deg_counts$Somatic_Hywi_Perc_AS <- ecdf(piRNA_Deg_counts$Somatic_Hywi_Perc_AS)(piRNA_Deg_counts$Somatic_Hywi_Perc_AS)

# Repeat for only Colch Hywi Sense piRNAs

piRNA_Deg_counts$Somatic_Hywi_Perc_S <- (piRNA_Deg_counts$Colch_Hywi_S_Counts_RPK)

piRNA_Deg_counts$Somatic_Hywi_Perc_S <- ecdf(piRNA_Deg_counts$Somatic_Hywi_Perc_S)(piRNA_Deg_counts$Somatic_Hywi_Perc_S)

# Repeat with Hyli

piRNA_Deg_counts$Somatic_Hyli_Perc <- (piRNA_Deg_counts$Colch_Hyli_AS_Counts_RPK +
  piRNA_Deg_counts$Colch_Hyli_S_Counts_RPK)

piRNA_Deg_counts$Somatic_Hyli_Perc <- ecdf(piRNA_Deg_counts$Somatic_Hyli_Perc)(piRNA_Deg_counts$Somatic_Hyli_Perc)

# Repeat for only Colch Hyli Antisense piRNAs

piRNA_Deg_counts$Somatic_Hyli_Perc_AS <- (piRNA_Deg_counts$Colch_Hyli_AS_Counts_RPK)

piRNA_Deg_counts$Somatic_Hyli_Perc_AS <- ecdf(piRNA_Deg_counts$Somatic_Hyli_Perc_AS)(piRNA_Deg_counts$Somatic_Hyli_Perc_AS)

# Repeat for only Colch Hyli Sense piRNAs

piRNA_Deg_counts$Somatic_Hyli_Perc_S <- (piRNA_Deg_counts$Colch_Hyli_S_Counts_RPK)

piRNA_Deg_counts$Somatic_Hyli_Perc_S <- ecdf(piRNA_Deg_counts$Somatic_Hyli_Perc_S)(piRNA_Deg_counts$Somatic_Hyli_Perc_S)

# write table that summarizes data write.table(piRNA_Deg_counts, file =
# 'objects/Annotated_piRNA_Degradome_DGE_Count_Matrix.txt', sep = '\t')

```

## GO-Term Enrichment Analysis

GO-term enrichment analysis was performed on upregulated transcripts against the entire transcriptome to investigate a functional response to somatic *hywi* knockdown.

GO-term enrichment analysis was performed using goatools v0.6.10 using the script: `goatools_GO_enrichment.pl`

```

# Load GO annotation results

GO_table <- read.table("objects/GO_upreg_trans_full_ref.txt", header = T, sep = "\t")

# Take enriched biological processes

GO_table_sub <- subset(GO_table, p_bonferroni <= 0.05 & NS == "BP")

# Include GO accession number, GO term, ratio in study, ratio in population,
# bonferroni corrected p-value, and transcript IDs

GO_table_sub <- GO_table_sub[, c(1, 4:6, 10, 14)]
colnames(GO_table_sub) <- c("GO", "GO_Term", "Study", "Pop", "p_val", "ID")

```

```
# Print table
```

```
kable(GO_table_sub, format = "markdown", padding = 100)
```

| GO                  | GO_Term                                                                | Study  | Pop       | p_val  | ID                                                                                                                                                                                                                                                                                                            |
|---------------------|------------------------------------------------------------------------|--------|-----------|--------|---------------------------------------------------------------------------------------------------------------------------------------------------------------------------------------------------------------------------------------------------------------------------------------------------------------|
| ... GO:<br>0006952  | defense<br>response                                                    | 26/441 | 753/38747 | 0.0142 | t11117aep, t12198aep, t16424aep,<br>t17178aep, t17750aep, t21013aep,<br>t21682aep, t22133aep, t24687aep,<br>t32280aep, t33020aep, t34385aep,<br>t34424aep, t34475aep, t35573aep,<br>t35608aep, t35837aep, t38672aep,<br>t38673aep, t5914aep, t6387aep,<br>t7326aep, t7388aep, t8582aep,<br>t8645aep, t8946aep |
| ... GO:<br>0051899  | membrane<br>depolarization                                             | 7/441  | 46/38747  | 0.0170 | t17803aep, t18338aep, t24938aep,<br>t25020aep, t526aep, t527aep,<br>t9936aep                                                                                                                                                                                                                                  |
| .....GO:<br>2000051 | negative<br>regulation of<br>non-canonical<br>Wnt signaling<br>pathway | 4/441  | 8/38747   | 0.0221 | t29674aep, t30176aep, t33022aep,<br>t8142aep                                                                                                                                                                                                                                                                  |
| ... GO:<br>0048440  | carpel<br>development                                                  | 3/441  | 3/38747   | 0.0290 | t35573aep, t38672aep, t38673aep                                                                                                                                                                                                                                                                               |
| ... GO:<br>0045087  | innate immune<br>response                                              | 14/441 | 258/38747 | 0.0370 | t11117aep, t17178aep, t22133aep,<br>t24687aep, t34385aep, t34424aep,<br>t35573aep, t35608aep, t35837aep,<br>t38672aep, t38673aep, t6387aep,<br>t7326aep, t8946aep                                                                                                                                             |
| .....GO:<br>0031050 | dsRNA<br>processing                                                    | 5/441  | 19/38747  | 0.0377 | t30770aep, t35488aep, t38672aep,<br>t38673aep, t5914aep                                                                                                                                                                                                                                                       |
| .....GO:<br>0042108 | positive<br>regulation of<br>cytokine<br>biosynthetic<br>process       | 5/441  | 20/38747  | 0.0498 | t21682aep, t22133aep, t24687aep,<br>t34424aep, t8645aep                                                                                                                                                                                                                                                       |

## Software versions

This document was computed on Fri Jan 10 10:35:54 2020 with the following R package versions.

R version 3.5.3 (2019-03-11)

Platform: x86\_64-apple-darwin15.6.0 (64-bit)

Running under: macOS Mojave 10.14.5

Matrix products: default

BLAS: /Library/Frameworks/R.framework/Versions/3.5/Resources/lib/libRblas.0.dylib

LAPACK: /Library/Frameworks/R.framework/Versions/3.5/Resources/lib/libRlapack.dylib

locale:

[1] en\_US.UTF-8/en\_US.UTF-8/en\_US.UTF-8/C/en\_US.UTF-8/en\_US.UTF-8

attached base packages:

```
[1] stats      graphics  grDevices  utils      datasets  methods   base
```

other attached packages:

```
[1] ggplot2_3.2.0 xtable_1.8-3 edgeR_3.22.5 limma_3.38.3 knitr_1.22
```

loaded via a namespace (and not attached):

```
[1] Rcpp_1.0.1      magrittr_1.5    splines_3.5.3   tidyselect_0.2.5
[5] munsell_0.5.0   colorspace_1.4-1 lattice_0.20-38 R6_2.4.0
[9] rlang_0.4.0     highr_0.7       dplyr_0.8.3     stringr_1.4.0
[13] tools_3.5.3     grid_3.5.3      gtable_0.3.0    xfun_0.5
[17] withr_2.1.2     htmltools_0.3.6 assertthat_0.2.1 yaml_2.2.0
[21] lazyeval_0.2.2  digest_0.6.20   tibble_2.1.3    crayon_1.3.4
[25] purrr_0.3.2     formatR_1.7     glue_1.3.1      evaluate_0.13
[29] rmarkdown_1.12 stringi_1.4.3    compiler_3.5.3  pillar_1.4.2
[33] scales_1.0.0    locfit_1.5-9.1  pkgconfig_2.0.2
```

# 3 Ping Pong Analysis

*Bryan Teefy*

*12/20/2019*

## Ping-Pong Hits

PIWI targets are often degraded with a distinctive “ping-pong signature” consisting of a 10 bp overlap between the 5’ ends of antisense-mapped piRNAs and sense-mapped piRNAs/degradome reads. Transcripts that had a ping-pong signature comprised of at least 10 of the contributing species (antisense piRNA, sense piRNA and degradome read) in the correct orientation were deemed “ping-pong hits”. Based on PIWI protein homology, a “canonical” ping-pong hit occurs between antisense-mapped Hywi piRNAs and sense-mapped Hyli piRNAs while an “inverse” ping-pong hit occurs between an antisense-mapped Hyli piRNA and a sense-mapped Hywi piRNA.

2047 transcripts have a “canonical” ping-pong hit in whole animals compared to only 709 transcripts with an “inverse” ping-pong hit in whole animals. Likewise, 254 transcripts have a “canonical” ping-pong hit in epithelial animals while 74 transcripts have “inverse” ping-pong hits in epithelial animals. This suggests that in *Hydra*, canonical ping-pong is more common in either lineage.

To identify transcripts with “ping-pong” hits, we used the following approach:

piRNA and Degradome BAM files generated from the Bowtie mapping strategy in RMD1 were converted to BED files using the script: `bam_to_bed.sh`.

The script “`grouping.sh`” retains only those transcripts that have at least 10 piRNA/degradome reads beginning at a particular position such that the depth criteria for calling a ping-pong hit can be met. The script outputs transcript ID, start position of a piRNA/degradome read, and 10 bps from the start of the piRNA/degradome read. Adding 10 bps from the start position allows for the subsequent `overlap_BT.perl` script to find reads that overlap by the specified 10 bp length.

`grouping.sh` uses: “`group_reads_sense.perl`” and “`group_reads_antisense.perl`”

The script “`overlap.sh`” generates a matrix containing ping-pong hit coordinates.

“`overlap.sh`” makes uses: “`overlap_BT.perl`”

“`overlap.sh`” output files were converted to `.txt` files, merged in R, and used to generate TRUE/FALSE statements in reference to whether a transcript has a Whole Animal or a Epithelial Animal canonical or inverse ping-pong hit.

The resultant table is: “`Ping_Pong_Matrix_Bowtie.txt`”

## Load the Necessary Files

```
#Load normalized piRNA and degradome counts, expression data, DGE data from RMD2.
```

```
Read_Counts_Master_DF <- read.table("objects/Annotated_piRNA_Degradome_DGE_Count_Matrix.txt", sep = "\t")
```

```
#Load binary matrix of ping-pong hits per transcript.
```

```
Ping_Pong_Matrix <- read.table("objects/Ping_Pong_Matrix.txt")
```

## Load Necessary Packages

```
###load packages###  
  
library(ggplot2)  
  
library(reshape2)  
  
library(ggpubr)
```

## Visualizing Ping-Pong Hits

To visualize ping-pong hit distribution, we generated pie charts consisting of all transcripts that have at least one ping-pong hit and plot the output by transcript class for 1) Whole Animals and 2) Epithelial Animals.

```
Read_Counts_Master_DF <- merge(Read_Counts_Master_DF, Ping_Pong_Matrix, by = "ID", all = T)
```

```
#Retrieve hits
```

```
WT_ping_hits <- c(sum(Read_Counts_Master_DF$Whole_Ping_Pong & Read_Counts_Master_DF$Transcript_Class == "Whole Animal"))
```

```
Colch_ping_hits <- c(sum(Read_Counts_Master_DF$Epi_Ping_Pong & Read_Counts_Master_DF$Transcript_Class == "Epithelial Animal"))
```

```
#Create pie chart with percentages
```

```
#Whole Animal Canonical
```

```
lbls <- c("TEs", "ncRNAs", "Unchar", "Genes")
```

```
colors = c("red", "blue", "gray", "green")
```

```
pct <- round(WT_ping_hits/sum(WT_ping_hits)*100)
```

```
lbls <- paste(lbls, pct) # add percents to labels
```

```
lbls <- paste(lbls,"%",sep="") # ad % to labels
```

```
pie(WT_ping_hits,labels = lbls, col=colors,
```

```
  main="Whole Animal Ping-Pong Hits")
```

## Whole Animal Ping-Pong Hits

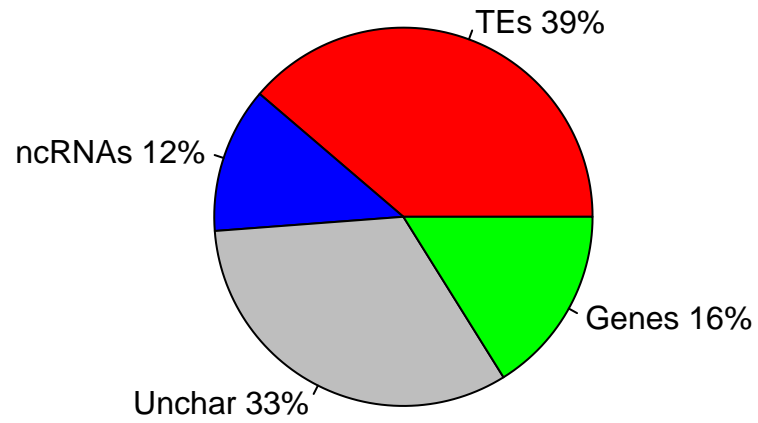

```
#Epithelial Animal Canonical
lbls <- c("TEs", "ncRNAs", "Unchar", "Genes")
colors = c("red", "blue", "gray", "green")
pct <- round(Colch_ping_hits/sum(Colch_ping_hits)*100)
lbls <- paste(lbls, pct) # add percents to labels
lbls <- paste(lbls,"%",sep="") # ad % to labels
pie(Colch_ping_hits,labels = lbls, col=colors,
    main="Epithelial Animal Ping-Pong Hits")
```



## Epithelial Animal Ping-Pong Hits

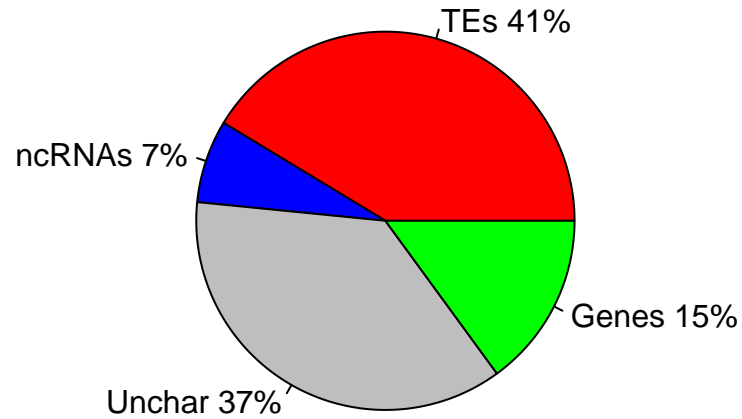

```
#Repeat for inverse ping-pong
```

```
WT_inv_ping_hits <- c(sum(Read_Counts_Master_DF$Whole_Ping_Pong_Inverse & Read_Counts_Master_DF$Transc
```

```
Colch_inv_ping_hits <- c(sum(Read_Counts_Master_DF$Epi_Ping_Pong_Inverse & Read_Counts_Master_DF$Transc
```

```
#Whole Animal Inverse
```

```
lbls <- c("TEs", "ncRNAs", "Unchar", "Genes")
```

```
colors = c("red", "blue", "gray", "green")
```

```
pct <- round(WT_inv_ping_hits/sum(WT_inv_ping_hits)*100)
```

```
lbls <- paste(lbls, pct) # add percents to labels
```

```
lbls <- paste(lbls,"%",sep="") # ad % to labels
```

```
pie(WT_inv_ping_hits,labels = lbls, col=colors,  
    main="Whole Animal Inverse Ping-Pong Hits")
```

## Whole Animal Inverse Ping-Pong Hits

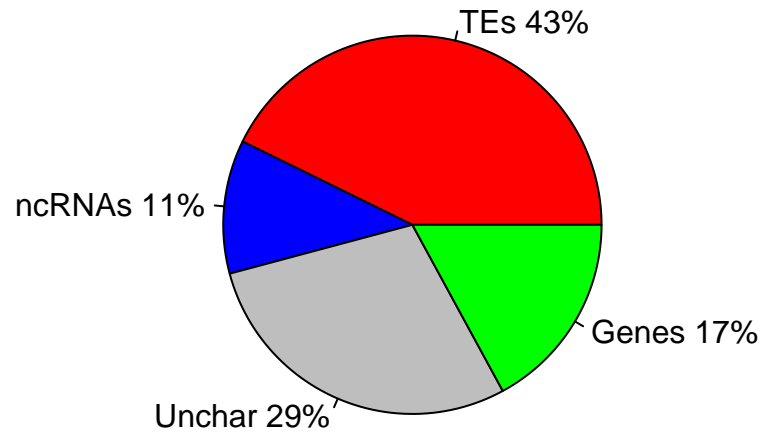

```
#Epithelial Animal Inverse  
lbls <- c("TEs", "ncRNAs", "Unchar", "Genes")  
colors = c("red", "blue", "gray", "green")  
pct <- round(Colch_inv_ping_hits/sum(Colch_inv_ping_hits)*100)  
lbls <- paste(lbls, pct) # add percents to labels  
lbls <- paste(lbls,"%",sep="") # ad % to labels  
pie(Colch_inv_ping_hits,labels = lbls, col=colors,  
    main="Epithelial Animal Inverse Ping-Pong Hits")
```

## Epithelial Animal Inverse Ping-Pong Hits

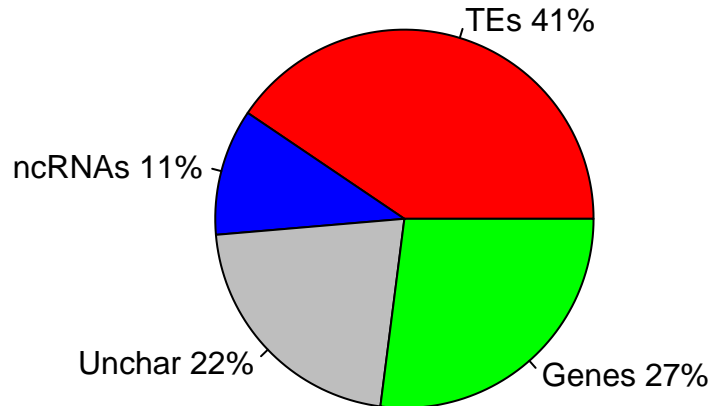

### piRNA Positional Overlap Frequency Interrogation

Ping-pong processing of transcripts is known to occur in *Hydra* but whether this type of processing is active in somatic stem cells remains unknown. piRNAs from Whole Animals and Epithelial Animals were used to address this problem by generating piRNA overlap frequency plots. Ping-pong processing should consist of a preponderance of 10 bp overlaps between antisense- and sense-mapped piRNAs.

Positional information was extracted from piRNA BAM files and exported as a .txt file using the script: `get_position.sh`. This script uses: “`get_rep_piRNA_sense_BT.perl`” and “`get_rep_piRNA_antisense_BT.perl`”.

txt files were converted into BED files using the script: “`Overlap_bed_ping.sh`”.

BED files containing piRNA overlap positions and overlap length between pairs of piRNAs (i.e. Hywi antisense/Hyli sense) were generated using the script “`windowbed_ping.sh`”.

The output of “`windowbed_ping.sh`” are BED files consisting of rows indexing a piRNA overlap event (ex. an overlap event between piRNA\_1 and piRNA\_2) within a 30 bp window.

The file contains has 11 columns:

- 1) Transcript on which piRNA\_1 is mapped
- 2) Start position of piRNA\_1
- 3) End position of piRNA\_1
- 4) Sequence of piRNA\_1
- 5) Copy number of piRNA\_1
- 6) Transcript on which piRNA\_2 is mapped
- 7) Start position of piRNA\_2
- 8) End position of piRNA\_2
- 9) Sequence of piRNA\_2
- 10) Copy number of piRNA\_2
- 11) 5'-5' piRNA overlap length

Overlap lengths were computed and compiled into a matrix entitled “`Ping_Pong_Overlap_Matrix`” using the R script, “`Ping_Pong_Matrix_Generation.R`” and run using the script, “`run_Ping_Pong_Matrix_Generation.sh`”

piRNA overlaps were queried in 0 to 20 base pair overlap window as in Gainetdinov *et al.*, 2018.

```
#Load Matrices of piRNA overlap events
```

```
Ping_Pong_Overlap_Matrix <- read.table("objects/Ping_Pong_Overlap_Matrix")
```

```
#Plot individual Overlap Frequency Plots
```

```
a <- ggplot(data=Ping_Pong_Overlap_Matrix, aes(x=Overlap_Length, y=WT_Hy1iS_HywiAS, group = 1)) +  
  geom_line(stat="identity") + xlab("5'-5' Overlap Length") + ylab("Frequency") + ggtitle("WT Hy1iS/HywiAS") +  
  geom_point()
```

```
b <- ggplot(data=Ping_Pong_Overlap_Matrix, aes(x=Overlap_Length, y=WT_HywiS_Hy1iAS, group = 1)) +  
  geom_line(stat="identity") + xlab("5'-5' Overlap Length") + ylab("Frequency") + ggtitle("WT HywiS/Hy1iAS") +  
  geom_point()
```

```
c <- ggplot(data=Ping_Pong_Overlap_Matrix, aes(x=Overlap_Length, y=WT_Hy1iS_Hy1iAS, group = 1)) +  
  geom_line(stat="identity") + xlab("5'-5' Overlap Length") + ylab("Frequency") + ggtitle("WT Hy1iS/Hy1iAS") +  
  geom_point()
```

```
d <- ggplot(data=Ping_Pong_Overlap_Matrix, aes(x=Overlap_Length, y=WT_HywiS_HywiAS, group = 1)) +  
  geom_line(stat="identity") + xlab("5'-5' Overlap Length") + ylab("Frequency") + ggtitle("WT HywiS/HywiAS") +  
  geom_point()
```

```
e <- ggplot(data=Ping_Pong_Overlap_Matrix, aes(x=Overlap_Length, y=Colch_Hy1iS_HywiAS, group = 1)) +  
  geom_line(stat="identity") + xlab("5'-5' Overlap Length") + ylab("Frequency") + ggtitle("Epithelial Hy1iS/HywiAS") +  
  geom_point()
```

```
f <- ggplot(data=Ping_Pong_Overlap_Matrix, aes(x=Overlap_Length, y=Colch_HywiS_Hy1iAS, group = 1)) +  
  geom_line(stat="identity") + xlab("5'-5' Overlap Length") + ylab("Frequency") + ggtitle("Epithelial HywiS/Hy1iAS") +  
  geom_point()
```

```
g <- ggplot(data=Ping_Pong_Overlap_Matrix, aes(x=Overlap_Length, y=Colch_Hy1iS_Hy1iAS, group = 1)) +  
  geom_line(stat="identity") + xlab("5'-5' Overlap Length") + ylab("Frequency") + ggtitle("Epithelial Hy1iS/Hy1iAS") +  
  geom_point()
```

```
h <- ggplot(data=Ping_Pong_Overlap_Matrix, aes(x=Overlap_Length, y=Colch_HywiS_HywiAS, group = 1)) +  
  geom_line(stat="identity") + xlab("5'-5' Overlap Length") + ylab("Frequency") + ggtitle("Epithelial HywiS/HywiAS") +  
  geom_point()
```

```
#Arrange ping-pong frequency plots
```

```
ggarrange(a,b,c,d,e,f,g,h, ncol = 4, nrow = 2)
```

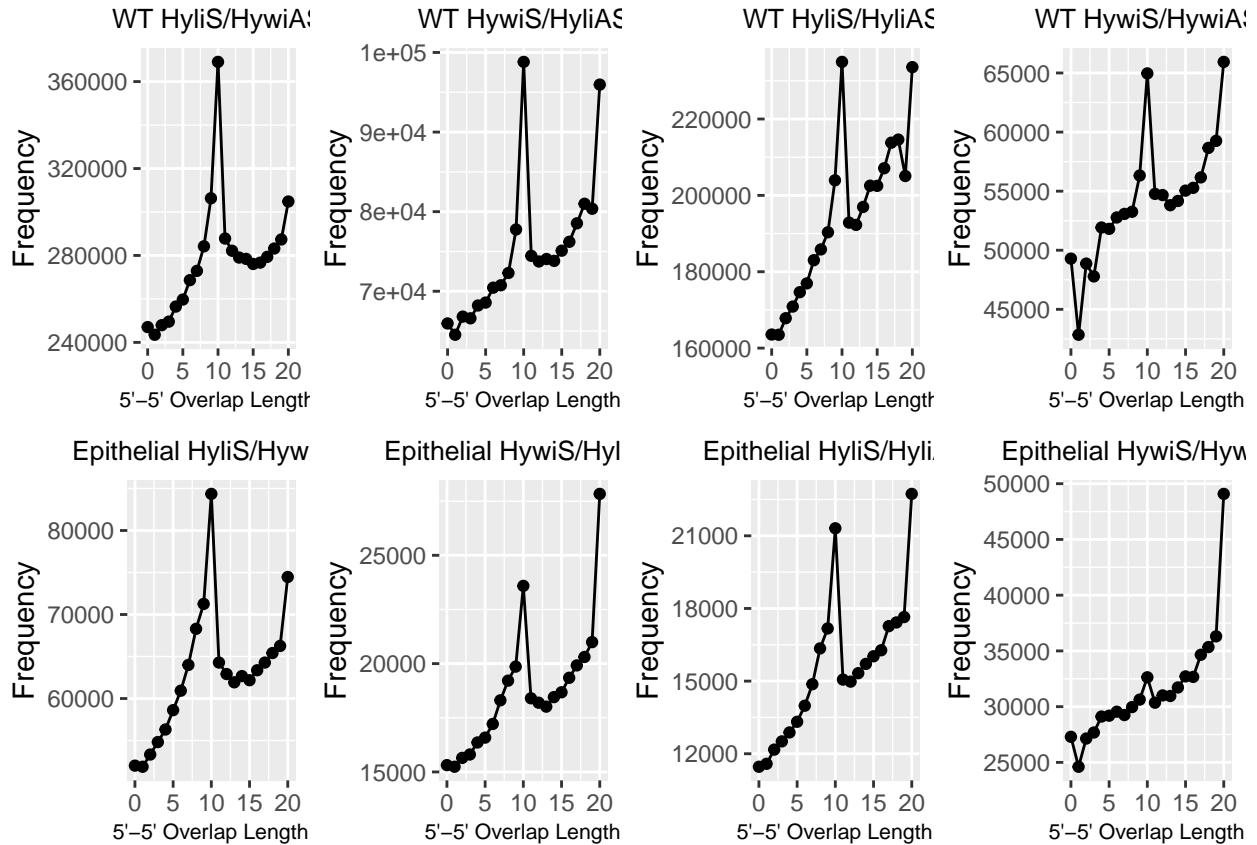

## Z10 scores

To quantify the strength of the ping-pong signal, we generated Z-scores for the 5'-5' overlap frequency data of piRNAs used in the previous analysis. Z-scores were taken from a range of 0 to 20 base pairs. Z10 scores are reported in the text.

```
#Import 5'-5' overlap frequency data and remove length information
```

```
Ping_Pong_No_Length <- Ping_Pong_Overlap_Matrix[,c(2:9)]
```

```
#Store empty vector for results
```

```
results <- vector("list",length(ncol(Ping_Pong_No_Length)))
```

```
#Generate nested for-loop to compute Z-score at every overlap length for each ping-pong pair (i.e. Hywi
```

```
for (j in 1:ncol(Ping_Pong_No_Length)) {
  col.use <- Ping_Pong_No_Length[,j]
  res <- numeric(length = length(col.use))
  n <- 0
  for (i in col.use) {
    message(i)
    notx <- col.use[!(col.use == i)]
    z <- ((i - mean(notx))/(sd(notx)))
    message(z)
  }
}
```

```

message(n)
n <- n + 1
message(n)
res[n] <- z
obj <- as.data.frame(res)
}
results[[j]] <- res
}

#Bind names and overlap lengths to Z-scores

results.df <- do.call(cbind,results)

final_res <- cbind(Ping_Pong_Overlap_Matrix$Overlap_Length, results.df)

Col_Names <- c("Overlap_Length", "WT_HywiS_HywiAS", "WT_HywiS_HyliAS", "WT_HyliS_HyliAS", "WT_HyliS_HywiAS")

colnames(final_res) <- paste(Col_Names, sep = "")

final_res <- as.data.frame(final_res)

#Plot individual Z-scores

a<-ggplot(data=final_res, aes(x=Overlap_Length, y=WT_HyliS_HywiAS)) +
  geom_bar(stat="identity") + xlab("5'-5' Overlap Overlap_Length") + ylab("Z-Score") + ggtitle("WT HyliS_HywiAS")

b<-ggplot(data=final_res, aes(x=Overlap_Length, y=WT_HywiS_HyliAS)) +
  geom_bar(stat="identity") + xlab("5'-5' Overlap Overlap_Length") + ylab("Z-Score") + ggtitle("WT HywiS_HyliAS")

c<-ggplot(data=final_res, aes(x=Overlap_Length, y=WT_HyliS_HyliAS)) +
  geom_bar(stat="identity") + xlab("5'-5' Overlap Overlap_Length") + ylab("Z-Score") + ggtitle("WT HyliS_HyliAS")

d<-ggplot(data=final_res, aes(x=Overlap_Length, y=WT_HywiS_HywiAS)) +
  geom_bar(stat="identity") + xlab("5'-5' Overlap Overlap_Length") + ylab("Z-Score") + ggtitle("WT HywiS_HywiAS")

e<-ggplot(data=final_res, aes(x=Overlap_Length, y=Colch_HyliS_HywiAS)) +
  geom_bar(stat="identity") + xlab("5'-5' Overlap Overlap_Length") + ylab("Z-Score") + ggtitle("Epithel_HyliS_HywiAS")

f<-ggplot(data=final_res, aes(x=Overlap_Length, y=Colch_HywiS_HyliAS)) +
  geom_bar(stat="identity") + xlab("5'-5' Overlap Overlap_Length") + ylab("Z-Score") + ggtitle("Epithel_HywiS_HyliAS")

g<-ggplot(data=final_res, aes(x=Overlap_Length, y=Colch_HyliS_HyliAS)) +
  geom_bar(stat="identity") + xlab("5'-5' Overlap Overlap_Length") + ylab("Z-Score") + ggtitle("Epithel_HyliS_HyliAS")

h<-ggplot(data=final_res, aes(x=Overlap_Length, y=Colch_HywiS_HywiAS)) +
  geom_bar(stat="identity") + xlab("5'-5' Overlap Overlap_Length") + ylab("Z-Score") + ggtitle("Epithel_HywiS_HywiAS")

#Arrange Z-score plots

ggarrange(a,b,c,d,e,f,g,h, ncol = 4, nrow = 2)

```

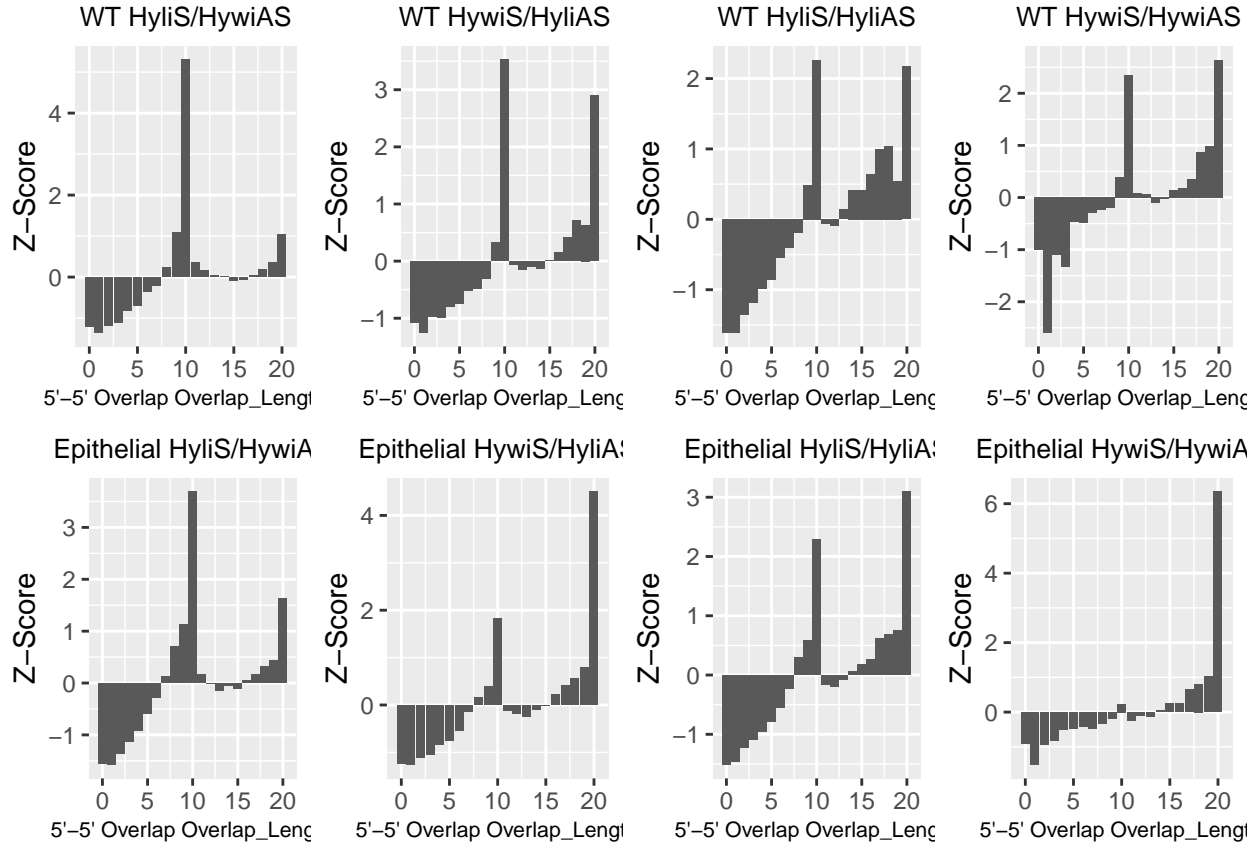

## Phasing

Phasing is a conserved mechanism of piRNA biogenesis in which an RNA molecule is processively converted into a piRNA. If phasing occurs in a manner such that there is no piRNA trimming, there should be no distance between the 3' and 5' ends of adjacent, mature piRNAs. Thus the Z0 score, the distance between 3' and 5' piRNA ends, should be above 1.96 (p-value of 0.05) if phasing is occurring. Z-scores were calculated from a range of -10 to 50 base pair overlaps.

BED files containing piRNA overlap positions and overlap length between pairs of piRNAs from the same group (i.e. WT Hywi sense/WT Hywi sense) were generated using the script “windowBED\_phasing.sh” using the output of “Overlap\_bed\_ping.sh.”

The output of windowBED\_phasing.sh are BED files consisting of rows indexing a piRNA overlap event (ex. an overlap event between piRNA\_1 and piRNA\_2) within a 200 bp window.

The file contains has 11 columns:

- 1) Transcript on which piRNA\_1 is mapped
- 2) Start position of piRNA\_1
- 3) End position of piRNA\_1
- 4) Sequence of piRNA\_1
- 5) Copy number of piRNA\_1
- 6) Transcript on which piRNA\_2 is mapped
- 7) Start position of piRNA\_2
- 8) End position of piRNA\_2
- 9) Sequence of piRNA\_2
- 10) Copy number of piRNA\_2
- 11) 5'-5' piRNA overlap length

Overlap lengths were computed and compiled into a matrix entitled “Phasing\_Overlap\_Matrix” using the R script, “Phasing.R” and run using the script, “run\_Phasing.sh”. Importantly, self-referential piRNAs are omitted such that the 3'-5' distance between piRNAs that pair with themselves was not calculated.

Below, Z-scores are calculated for 3'-5' distances between piRNAs. 3'-5' distances were queried in -10 to 50 base pair window as in Gainetdinov *et al.*, 2018.

```

#Import Phasing Matrix

Phasing_Overlap_Matrix <- read.table("objects/Phasing_Overlap_Matrix")

#Remove Length Information

Phasing_No_Length <- Phasing_Overlap_Matrix[,c(2:5)]

#Store empty vector for results

results <- vector("list",length(ncol(Phasing_No_Length)))

#Generate nested for-loop to compute Z-score at every overlap length

for (j in 1:ncol(Phasing_No_Length)) {
  col.use <- Phasing_No_Length[,j]
  res <- numeric(length = length(col.use))
  n <- 0
  for (i in col.use) {
    message(i)
    notx <- col.use[!(col.use == i)]
    z <- ((i - mean(notx))/(sd(notx)))
    message(z)
    message(n)
    n <- n + 1
    message(n)
    res[n] <- z
    obj <- as.data.frame(res)
  }
  results[[j]] <- res
}

#Bind names and overlap lengths to Z-scores

results.df <- do.call(cbind,results)

final_res <- cbind((Phasing_Overlap_Matrix$Length), results.df)

Col_Names_Phasing <- c("Length", "WT_Hywi_S", "WT_Hyli_S", "Colch_Hywi_S", "Colch_Hyli_S")

colnames(final_res) <- paste(Col_Names_Phasing, sep = "")

final_res <- as.data.frame(final_res)

#Plot individual Z-scores

a <- ggplot(data=final_res, aes(x=Length, y=WT_Hywi_S)) +
  geom_bar(stat="identity") + xlab("3'-5' Overlap Length") + ylab("Z-Score") + ggtitle("WT Hywi Phasing")

b <- ggplot(data=final_res, aes(x=Length, y=WT_Hyli_S)) +
  geom_bar(stat="identity") + xlab("3'-5' Overlap Length") + ylab("Z-Score") + ggtitle("WT Hyli Phasing")

c <- ggplot(data=final_res, aes(x=Length, y=Colch_Hywi_S)) +

```



```

geom_bar(stat="identity") + xlab("3'-5' Overlap Length") + ylab("Z-Score") + ggtitle("Epithelial Hywi
d <- ggplot(data=final_res, aes(x=Length, y=Colch_Hyli_S)) +
geom_bar(stat="identity") + xlab("3'-5' Overlap Length") + ylab("Z-Score") + ggtitle("Epithelial Hyli
#Arrange
ggarrange(a,b,c,d, ncol = 2, nrow = 2)

```

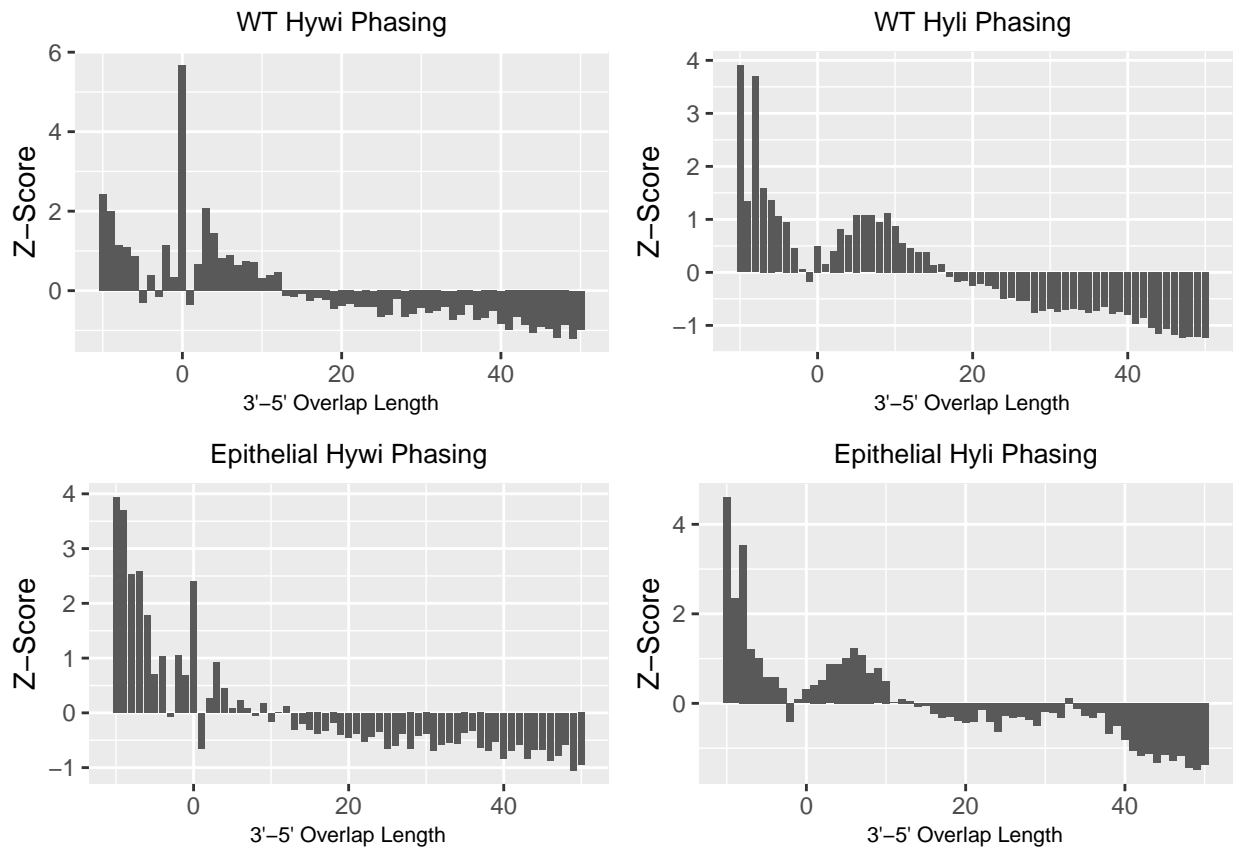

```

#Write table
#write.csv(Read_Counts_Master_DF, file = "objects/Table_S1.csv")

```

## Software versions

This document was computed on Fri Jan 10 10:43:43 2020 with the following R package versions.

R version 3.5.3 (2019-03-11)

Platform: x86\_64-apple-darwin15.6.0 (64-bit)

Running under: macOS Mojave 10.14.5

Matrix products: default

BLAS: /Library/Frameworks/R.framework/Versions/3.5/Resources/lib/libRblas.0.dylib

LAPACK: /Library/Frameworks/R.framework/Versions/3.5/Resources/lib/libRlapack.dylib

locale:

```
[1] en_US.UTF-8/en_US.UTF-8/en_US.UTF-8/C/en_US.UTF-8/en_US.UTF-8
```

attached base packages:

```
[1] stats      graphics  grDevices  utils      datasets  methods   base
```

other attached packages:

```
[1] ggpubr_0.2.4  magrittr_1.5  reshape2_1.4.3 ggplot2_3.2.0
```

loaded via a namespace (and not attached):

```
[1] Rcpp_1.0.1      knitr_1.22      cowplot_0.9.4   tidyselect_0.2.5
[5] munsell_0.5.0   colorspace_1.4-1 R6_2.4.0        rlang_0.4.0
[9] plyr_1.8.4      stringr_1.4.0   dplyr_0.8.3     tools_3.5.3
[13] grid_3.5.3      gtable_0.3.0    xfun_0.5         withr_2.1.2
[17] htmltools_0.3.6 yaml_2.2.0      lazyeval_0.2.2  digest_0.6.20
[21] assertthat_0.2.1 tibble_2.1.3    ggsignif_0.5.0  crayon_1.3.4
[25] purrr_0.3.2     glue_1.3.1      evaluate_0.13   rmarkdown_1.12
[29] labeling_0.3    stringi_1.4.3   compiler_3.5.3  pillar_1.4.2
[33] scales_1.0.0    pkgconfig_2.0.2
```

# 4 Lineage-sorted piRNA Count Generation

Bryan Teefy

12/20/2019

## Load Required Libraries

```
library(dplyr)
library(reshape2)
library(ggplot2)
library(ggpubr)
library(VennDiagram)
```

## Set Copy Number Thresholds for small RNA sequences

To determine which piRNA sequences might be unique to each of the three cell lineages in *Hydra*, we contrasted our Whole Animal Hywi and Hyli piRNA datasets with FAC-sorted lineage-specific small RNA libraries (Juliano *et al.*, 2014).

To control for the abundance of common versus exclusive piRNAs in our downstream analysis, we initially filtered out the lower copy small RNAs from each dataset. The threshold chosen for each dataset was 4 copies based on count frequency distributions visualized below.

First, small RNA files were mapped to the *Hydra* transcriptome using Bowtie v1.1.2 using the shell script, “sRNA\_mapping.sh.”

The options “-best -strata -k 1” were used because at this stage, mapping all possible hits was not yet necessary.

Copy number of unique piRNA sequences were quantified from BAM files generated from small RNA mapping using the script “get\_pos\_small\_RNA.sh.” This script made use of the perl scripts “get\_rep\_piRNA\_sense\_BT.perl” and “get\_rep\_piRNA\_antisense\_BT.perl”.

Plots of sequence copy number frequency were generated using the R script, “plot\_gen.R” and run with the script, “run\_plot\_gen.sh.”

Plots for each lineage and mapping orientation are visualized below.

```
# Sense Ecto

Ect_S_plot <- read.table("objects/Ect_S_plot")
A <- ggplot(data = Ect_S_plot, aes(x = Var1, y = Freq, group = 1)) + geom_line() +
  geom_point()
rm(Ect_S)
rm(Ect_S_plot)

# Endo

End_S_plot <- read.table("objects/End_S_plot")
B <- ggplot(data = End_S_plot, aes(x = Var1, y = Freq, group = 1)) + geom_line() +
  geom_point()
rm(End_S)
rm(End_S_plot)
```

```

# Int

Int_S_plot <- read.table("objects/Int_S_plot")
C <- ggplot(data = Int_S_plot, aes(x = Var1, y = Freq, group = 1)) + geom_line() +
  geom_point()
rm(Int_S)
rm(Int_S_plot)

# Antisense Ecto

Ect_AS_plot <- read.table("objects/Ect_AS_plot")
D <- ggplot(data = Ect_AS_plot, aes(x = Var1, y = Freq, group = 1)) + geom_line() +
  geom_point()
rm(Ect_AS)
rm(Ect_AS_plot)

# Endo

End_AS_plot <- read.table("objects/End_AS_plot")
E <- ggplot(data = End_AS_plot, aes(x = Var1, y = Freq, group = 1)) + geom_line() +
  geom_point()
rm(End_AS)
rm(End_AS_plot)

# Int

Int_AS_plot <- read.table("objects/Int_AS_plot")
G <- ggplot(data = Int_AS_plot, aes(x = Var1, y = Freq, group = 1)) + geom_line() +
  geom_point()

rm(Int_AS)
rm(Int_AS_plot)

# Plot

A <- A + geom_vline(xintercept = 4, color = "red") + scale_x_discrete(breaks = seq(0,
  50, 5)) + ggtitle("Ectodermal Sense") + theme(plot.title = element_text(hjust = 0.5,
  size = 10), axis.title.x = element_text(size = 8), axis.title.y = element_text(size = 8),
  axis.text.y = element_text(size = 8), axis.text.x = element_text(size = 8)) +
  xlab("Sequence Copy Number") + ylab("Frequency")

B <- B + geom_vline(xintercept = 4, color = "red") + scale_x_discrete(breaks = seq(0,
  50, 5)) + ggtitle("Endodermal Sense") + theme(plot.title = element_text(hjust = 0.5,
  size = 10), axis.title.x = element_text(size = 8), axis.title.y = element_text(size = 8),
  axis.text.y = element_text(size = 8), axis.text.x = element_text(size = 8)) +
  xlab("Sequence Copy Number") + ylab("Frequency")

C <- C + geom_vline(xintercept = 4, color = "red") + scale_x_discrete(breaks = seq(0,
  50, 5)) + ggtitle("Interstitial Sense") + theme(plot.title = element_text(hjust = 0.5,
  size = 10), axis.title.x = element_text(size = 8), axis.title.y = element_text(size = 8),
  axis.text.y = element_text(size = 8), axis.text.x = element_text(size = 8)) +
  xlab("Sequence Copy Number") + ylab("Frequency")

```

```

D <- D + geom_vline(xintercept = 4, color = "red") + scale_x_discrete(breaks = seq(0,
  50, 5)) + ggtitle("Ectodermal Antisense") + theme(plot.title = element_text(hjust = 0.5,
  size = 10), axis.title.x = element_text(size = 8), axis.title.y = element_text(size = 8),
  axis.text.y = element_text(size = 8), axis.text.x = element_text(size = 8)) +
  xlab("Sequence Copy Number") + ylab("Frequency")

E <- E + geom_vline(xintercept = 4, color = "red") + scale_x_discrete(breaks = seq(0,
  50, 5)) + ggtitle("Endodermal Antisense") + theme(plot.title = element_text(hjust = 0.5,
  size = 10), axis.title.x = element_text(size = 8), axis.title.y = element_text(size = 8),
  axis.text.y = element_text(size = 8), axis.text.x = element_text(size = 8)) +
  xlab("Sequence Copy Number") + ylab("Frequency")

G <- G + geom_vline(xintercept = 4, color = "red") + scale_x_discrete(breaks = seq(0,
  50, 5)) + ggtitle("Interstitial Antisense") + theme(plot.title = element_text(hjust = 0.5,
  size = 10), axis.title.x = element_text(size = 8), axis.title.y = element_text(size = 8),
  axis.text.y = element_text(size = 8), axis.text.x = element_text(size = 8)) +
  xlab("Sequence Copy Number") + ylab("Frequency")

# Arrange
ggarrange(A, D, B, E, C, G, ncol = 2, nrow = 3, labels = c("B", "C", "D", "E", "F",
  "G"))

```

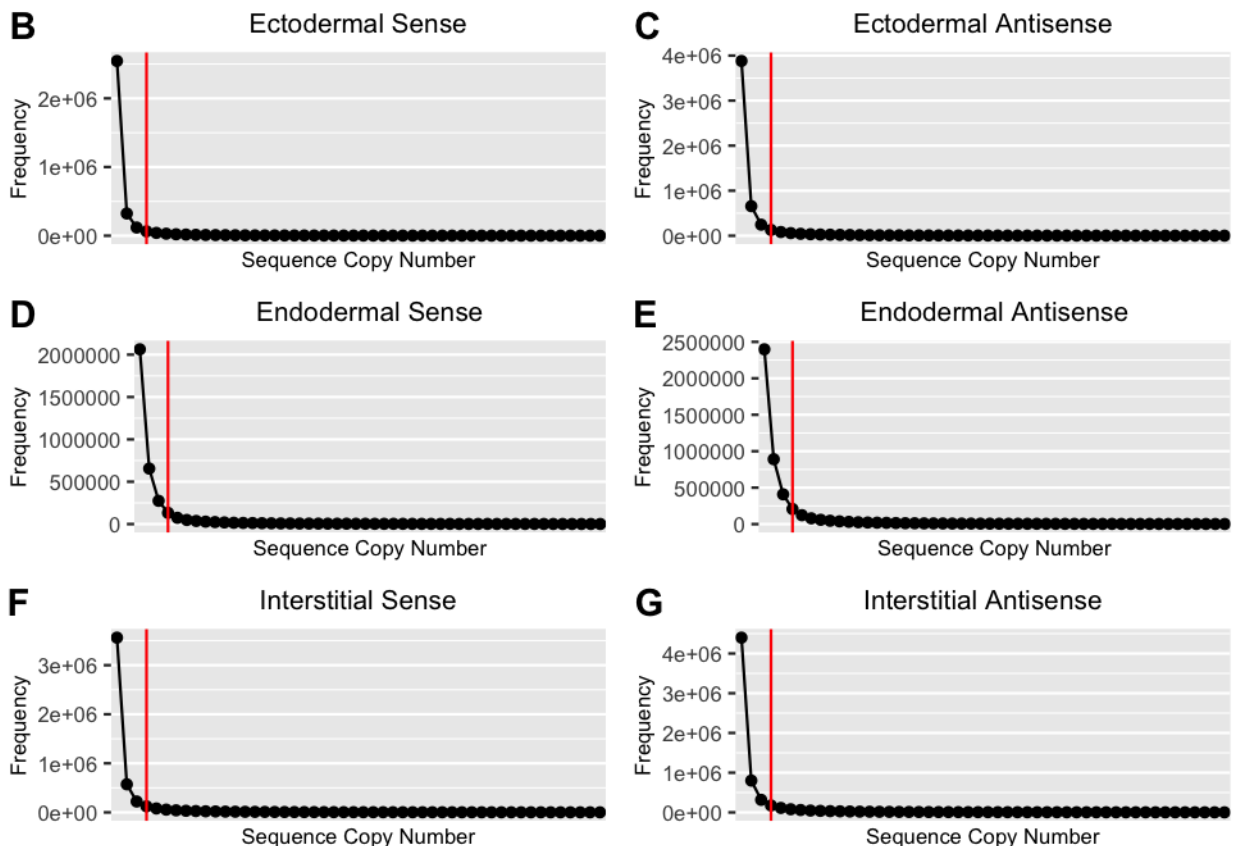

## Generate Lineage-sorted piRNA Libraries

As stated above, to control for the abundance of common versus exclusive piRNAs in our downstream analysis, we removed small RNAs sequences from each library with a copy number of fewer than 4. This was done using the R script, “remove\_low\_copy\_RNAs.R” and run using the script, “run\_remove\_low\_copy\_RNAs.sh.”

In order to more easily contrast piRNA and small RNA sequences, the trimmed piRNA fastq libraries and the trimmed small RNA fastq files were converted to dataframes that retained 1) sequences and 2) fastq headers using the script, “RNA\_Table\_Generation.R” and run using the script, “run\_RNA\_Table\_Generation.sh.”

The small RNA library dataframes were then contrasted with the small RNA sequences with 4 or greater copies using the script, “filtering\_small\_RNAs\_under\_four.R” and run with the script, “run\_filtering\_small\_RNAs\_under\_four.sh.” This generated small RNA dataframes consisting of only those small RNAs whose copy numbers were 4 or greater.

Next, piRNA and small RNA dataframes were contrasted such that only matching sequences were retained. Crucially, sequence copy number was reflective of the small RNA library so lineage-specific piRNA abundancies were reflected. This was done using the script, “piRNA\_contrast\_with\_over\_four\_small\_RNAs.R” and run using the script, “run\_piRNA\_contrast\_with\_over\_four\_small\_RNAs.sh.”

To map the resultant lineage-specific piRNA libraries, they were converted into FASTA files using the script, “make\_fasta\_from\_piRNA\_sRNA\_cross.R” and run using the script, “run\_make\_fasta\_from\_piRNA\_sRNA\_cross.sh”

Lineage-specific piRNA FASTA files were mapped as in RMD1 using Bowtie v1.1.2 while allowing for no mismatches in the sense orientation and three mismatches in the antisense orientation using the script, “sRNA\_map\_bowtie.sh.”

Count files were then generated fractionally as in RMD1 using the script, “sRNA\_Count\_Matrix.R” and run using the script, “run\_sRNA\_Count\_Matrix.sh.” The lineage-sorted count matrix is imported below.

## Load Transcriptome Annotation Matrix and Lineage-sorted piRNA Mapping Results

```
Read_Counts_Master_DF <- read.table("objects/Annotated_piRNA_Degradome_DGE_Count_Matrix.txt",
  sep = "\t")

# Retain only transcript Length and Classification

Length_and_Class <- Read_Counts_Master_DF[, c(1, 3, 11)]

# Import Lineage-specific piRNA count matrix

Bowtie_small_RNAs <- read.table("objects/small_RNA_Count_Matrix.txt", header = T)

Bowtie_small_RNAs <- merge(Length_and_Class, Bowtie_small_RNAs, by = "ID", all = T)
```

## Generate Normalized piRNA Mapping Density Values

PIWI targets should have a high density of piRNA counts. We normalize piRNA counts by transcript length to determine piRNA count density.

To determine if the piRNA count density values were significantly different between classes of transcripts, we performed Tukey’s Honest Significant Difference test to compare mean piRNA count density between each

transcript type (i.e. TE, ncRNA, Unchar., Gene) for each piRNA class (i.e. Hywi Antisense-mapped, Hyli Sense-mapped, etc.).

```
# Generate RPK values

norm <- (Bowtie_small_RNAs$Length/1000)

Bowtie_small_RNAs[, c(16:27)] <- Bowtie_small_RNAs[, c(4:15)]/norm

colnames(Bowtie_small_RNAs)[16:27] <- c("Endo_Hyli_AS_RPK", "Endo_Hyli_S_RPK", "Endo_Hywi_AS_RPK",
  "Endo_Hywi_S_RPK", "Ecto_Hyli_AS_RPK", "Ecto_Hyli_S_RPK", "Ecto_Hywi_AS_RPK",
  "Ecto_Hywi_S_RPK", "Int_Hyli_AS_RPK", "Int_Hyli_S_RPK", "Int_Hywi_AS_RPK", "Int_Hywi_S_RPK")

# only keep normalized counts
Normalized_Mapping_Counts_Matrix <- Bowtie_small_RNAs[, c(3, 16:27)]

Normalized_Mapping_Counts_Matrix_Formatted <- melt(Normalized_Mapping_Counts_Matrix,
  id.var = "Transcript_Class")

# Subset count density based on piRNA origin
Endo_Hyli_AS_Stats <- subset(Normalized_Mapping_Counts_Matrix_Formatted, variable ==
  "Endo_Hyli_AS_RPK")
Ecto_Hyli_AS_Stats <- subset(Normalized_Mapping_Counts_Matrix_Formatted, variable ==
  "Ecto_Hyli_AS_RPK")
Int_Hyli_AS_Stats <- subset(Normalized_Mapping_Counts_Matrix_Formatted, variable ==
  "Int_Hyli_AS_RPK")

Endo_Hywi_AS_Stats <- subset(Normalized_Mapping_Counts_Matrix_Formatted, variable ==
  "Endo_Hywi_AS_RPK")
Ecto_Hywi_AS_Stats <- subset(Normalized_Mapping_Counts_Matrix_Formatted, variable ==
  "Ecto_Hywi_AS_RPK")
Int_Hywi_AS_Stats <- subset(Normalized_Mapping_Counts_Matrix_Formatted, variable ==
  "Int_Hywi_AS_RPK")

Endo_Hyli_S_Stats <- subset(Normalized_Mapping_Counts_Matrix_Formatted, variable ==
  "Endo_Hyli_S_RPK")
Ecto_Hyli_S_Stats <- subset(Normalized_Mapping_Counts_Matrix_Formatted, variable ==
  "Ecto_Hyli_S_RPK")
Int_Hyli_S_Stats <- subset(Normalized_Mapping_Counts_Matrix_Formatted, variable ==
  "Int_Hyli_S_RPK")

Endo_Hywi_S_Stats <- subset(Normalized_Mapping_Counts_Matrix_Formatted, variable ==
  "Endo_Hywi_S_RPK")
Ecto_Hywi_S_Stats <- subset(Normalized_Mapping_Counts_Matrix_Formatted, variable ==
  "Ecto_Hywi_S_RPK")
Int_Hywi_S_Stats <- subset(Normalized_Mapping_Counts_Matrix_Formatted, variable ==
  "Int_Hywi_S_RPK")

# Develop Tukey Test Function (ANOVA post hoc test)

Tukey_Test <- function(x) {
  res.aov <- aov(value ~ Transcript_Class, data = x)
```

```

    return(TukeyHSD(res.aov))
}

# Run Tukey Test

Tukey_Test(Int_Hywi_AS_Stats)

## Tukey multiple comparisons of means
## 95% family-wise confidence level
##
## Fit: aov(formula = value ~ Transcript_Class, data = x)
##
## $Transcript_Class
##          diff          lwr          upr          p adj
## ncRNA-Gene  11.18870 -1.732110  24.10951 0.1165600
## TE-Gene      87.45788  68.944129 105.97164 0.0000000
## Unchar-Gene  21.68586   9.017549  34.35416 0.0000646
## TE-ncRNA     76.26919  56.088805  96.44956 0.0000000
## Unchar-ncRNA 10.49716  -4.501997  25.49631 0.2742610
## Unchar-TE    -65.77203 -85.791679 -45.75238 0.0000000

Tukey_Test(Int_Hyli_AS_Stats)

## Tukey multiple comparisons of means
## 95% family-wise confidence level
##
## Fit: aov(formula = value ~ Transcript_Class, data = x)
##
## $Transcript_Class
##          diff          lwr          upr          p adj
## ncRNA-Gene   6.238687  -3.851444  16.32882 0.3852025
## TE-Gene      49.952450  35.494669  64.41023 0.0000000
## Unchar-Gene  16.143014   6.250066  26.03596 0.0001622
## TE-ncRNA     43.713763  27.954479  59.47305 0.0000000
## Unchar-ncRNA  9.904327  -1.808828  21.61748 0.1309726
## Unchar-TE    -33.809435 -49.443203 -18.17567 0.0000002

Tukey_Test(Int_Hywi_S_Stats)

## Tukey multiple comparisons of means
## 95% family-wise confidence level
##
## Fit: aov(formula = value ~ Transcript_Class, data = x)
##
## $Transcript_Class
##          diff          lwr          upr          p adj
## ncRNA-Gene  15.374030 -11.224967  41.973026 0.4466386
## TE-Gene      47.751361   9.638630  85.864092 0.0070516
## Unchar-Gene   0.103119 -25.976075  26.182313 0.9999996
## TE-ncRNA     32.377331  -9.166343  73.921005 0.1870928
## Unchar-ncRNA -15.270911 -46.148425  15.606604 0.5817569
## Unchar-TE    -47.648242 -88.861038  -6.435445 0.0157555

Tukey_Test(Int_Hyli_S_Stats)

## Tukey multiple comparisons of means

```



```

##      95% family-wise confidence level
##
## Fit: aov(formula = value ~ Transcript_Class, data = x)
##
## $Transcript_Class
##           diff           lwr           upr           p adj
## ncRNA-Gene  14.661322 -15.08134  44.4039833  0.5844307
## TE-Gene     47.563943   4.94677  90.1811168  0.0215542
## Unchar-Gene  1.677485 -27.48394  30.8389089  0.9988502
## TE-ncRNA    32.902621 -13.55099  79.3562315  0.2639789
## Unchar-ncRNA -12.983838 -47.51068  21.5430087  0.7687600
## Unchar-TE   -45.886459 -91.97009   0.1971687  0.0514769

```

#### Tukey\_Test(Endo\_Hywi\_AS\_Stats)

```

##      Tukey multiple comparisons of means
##      95% family-wise confidence level
##
## Fit: aov(formula = value ~ Transcript_Class, data = x)
##
## $Transcript_Class
##           diff           lwr           upr           p adj
## ncRNA-Gene  1.021494  -1.3045665   3.347554  0.6720711
## TE-Gene     9.235563   5.9026365  12.568490  0.0000000
## Unchar-Gene  2.591703   0.3110993   4.872307  0.0184120
## TE-ncRNA    8.214070   4.5811096  11.847030  0.0000000
## Unchar-ncRNA  1.570209  -1.1300038   4.270423  0.4411350
## Unchar-TE   -6.643860 -10.2478852  -3.039835  0.0000130

```

#### Tukey\_Test(Endo\_Hyli\_AS\_Stats)

```

##      Tukey multiple comparisons of means
##      95% family-wise confidence level
##
## Fit: aov(formula = value ~ Transcript_Class, data = x)
##
## $Transcript_Class
##           diff           lwr           upr           p adj
## ncRNA-Gene  -1.206593 -26.212714  23.79953  0.9993198
## TE-Gene     4.318266 -31.512092  40.14862  0.9897142
## Unchar-Gene  16.216851  -8.300596  40.73430  0.3240012
## TE-ncRNA    5.524859 -33.530981  44.58070  0.9835894
## Unchar-ncRNA  17.423444 -11.604978  46.45187  0.4123082
## Unchar-TE   11.898585 -26.846192  50.64336  0.8595151

```

#### Tukey\_Test(Endo\_Hywi\_S\_Stats)

```

##      Tukey multiple comparisons of means
##      95% family-wise confidence level
##
## Fit: aov(formula = value ~ Transcript_Class, data = x)
##
## $Transcript_Class
##           diff           lwr           upr           p adj
## ncRNA-Gene  -17.233378 -47.04750  12.580743  0.4465845
## TE-Gene     -8.965788 -51.68535  33.753778  0.9494516

```

```
## Unchar-Gene -20.776673 -50.00816 8.454815 0.2610110
## TE-ncRNA 8.267590 -38.29763 54.832810 0.9684524
## Unchar-ncRNA -3.543295 -38.15310 31.066506 0.9936320
## Unchar-TE -11.810885 -58.00523 34.383464 0.9131739
```

#### Tukey\_Test(Endo\_Hyly\_S\_Stats)

```
## Tukey multiple comparisons of means
## 95% family-wise confidence level
##
## Fit: aov(formula = value ~ Transcript_Class, data = x)
##
## $Transcript_Class
## diff lwr upr p adj
## ncRNA-Gene -18.216985 -53.09706 16.66309 0.5362233
## TE-Gene -12.067538 -62.04592 37.91085 0.9256247
## Unchar-Gene -23.565493 -57.76394 10.63295 0.2877255
## TE-ncRNA 6.149447 -48.32804 60.62693 0.9915117
## Unchar-ncRNA -5.348508 -45.83913 35.14212 0.9865544
## Unchar-TE -11.497955 -65.54155 42.54564 0.9474980
```

#### Tukey\_Test(Ecto\_Hywi\_AS\_Stats)

```
## Tukey multiple comparisons of means
## 95% family-wise confidence level
##
## Fit: aov(formula = value ~ Transcript_Class, data = x)
##
## $Transcript_Class
## diff lwr upr p adj
## ncRNA-Gene 0.8620878 -1.6124419 3.336617 0.8074515
## TE-Gene 4.0776170 0.5319537 7.623280 0.0165405
## Unchar-Gene 3.3584078 0.9322358 5.784580 0.0021309
## TE-ncRNA 3.2155292 -0.6493179 7.080376 0.1413038
## Unchar-ncRNA 2.4963200 -0.3762443 5.368884 0.1144932
## Unchar-TE -0.7192092 -4.5532745 3.114856 0.9631250
```

#### Tukey\_Test(Ecto\_Hyly\_AS\_Stats)

```
## Tukey multiple comparisons of means
## 95% family-wise confidence level
##
## Fit: aov(formula = value ~ Transcript_Class, data = x)
##
## $Transcript_Class
## diff lwr upr p adj
## ncRNA-Gene -0.93451025 -4.648886 2.779865 0.9168589
## TE-Gene 1.77916290 -3.543030 7.101356 0.8260438
## Unchar-Gene 1.83076096 -1.811027 5.472549 0.5683538
## TE-ncRNA 2.71367315 -3.087629 8.514975 0.6257378
## Unchar-ncRNA 2.76527121 -1.546571 7.077114 0.3518877
## Unchar-TE 0.05159805 -5.703499 5.806695 0.9999956
```

#### Tukey\_Test(Ecto\_Hywi\_S\_Stats)

```
## Tukey multiple comparisons of means
## 95% family-wise confidence level
```

```
##
## Fit: aov(formula = value ~ Transcript_Class, data = x)
##
## $Transcript_Class
##           diff           lwr           upr           p adj
## ncRNA-Gene  -5.189888 -20.15224  9.772470 0.8094971
## TE-Gene     -1.341487 -22.78050 20.097529 0.9985224
## Unchar-Gene -7.395514 -22.06547  7.274446 0.5660225
## TE-ncRNA    3.848401 -19.52058 27.217376 0.9745554
## Unchar-ncRNA -2.205627 -19.57472 15.163465 0.9880155
## Unchar-TE   -6.054027 -29.23688 17.128825 0.9081087
```

```
Tukey_Test(Ecto_Hyli_S_Stats)
```

```
## Tukey multiple comparisons of means
## 95% family-wise confidence level
##
## Fit: aov(formula = value ~ Transcript_Class, data = x)
##
## $Transcript_Class
##           diff           lwr           upr           p adj
## ncRNA-Gene  -4.8736875 -24.31336 14.565989 0.9176453
## TE-Gene     -4.4537088 -32.30811 23.400695 0.9766221
## Unchar-Gene -9.7609653 -28.82075  9.298818 0.5528750
## TE-ncRNA    0.4199787 -29.94190 30.781861 0.9999839
## Unchar-ncRNA -4.8872778 -27.45388 17.679323 0.9448392
## Unchar-TE   -5.3072565 -35.42732 24.812807 0.9691284
```

## Visualizing piRNA Mapping

Since the range of observed count density values was large, we used a log scale to visualize piRNA count density. For violin plot visualization, we added a pseudocount to the raw piRNA counts to remove any 0 count density values that would return infinite values on a log scale. Violin plots allow for the visualization of high mapping outliers in the TE category. The pseudocount we chose was 0.001 since that approximated the lowest fractional count administered by our counting strategy. We explored piRNA count density for 1) Interstitial piRNAs and 2) Epithelial piRNAs.

```
# Create pseudocount
pseudocount <- 0.001

# Create a count matrix with transcript length and classification retained
count_matrix <- Bowtie_small_RNAs[, c(4:15, 2, 3)]

# Take the average of Endo and Ecto to generate Epithelial Counts
count_matrix$Epi_Hyli_AS <- (count_matrix$Endo_Hyli_AS + count_matrix$Ecto_Hyli_AS)/2
count_matrix$Epi_Hyli_S <- (count_matrix$Endo_Hyli_S + count_matrix$Ecto_Hyli_S)/2

count_matrix$Epi_Hywi_AS <- (count_matrix$Endo_Hywi_AS + count_matrix$Ecto_Hywi_AS)/2
count_matrix$Epi_Hywi_S <- (count_matrix$Endo_Hywi_S + count_matrix$Ecto_Hywi_S)/2

# Add pseudocount to piRNA counts then generate piRNA count density values (RPK)
count_matrix[, c(9:12, 15:18)] <- count_matrix[, c(9:12, 15:18)] + pseudocount
count_matrix[, c(9:12, 15:18)] <- count_matrix[, c(9:12, 15:18)]/count_matrix$Length
```

```

# Plot interstitial piRNA count density values
Int_matrix_data <- count_matrix[, c(9:12, 14)]
Int_matrix_data_formatted <- melt(Int_matrix_data, id.var = "Transcript_Class")
colnames(Int_matrix_data_formatted) <- c("Transcript_Class", "piRNA_Origin", "piRNA_Mapping_Density")
Int_matrix_data_formatted$Transcript_Class <- factor(Int_matrix_data_formatted$Transcript_Class,
  levels = c("TE", "ncRNA", "Unchar", "Gene"))
Int_level_order <- c("Int_Hywi_AS", "Int_Hywi_S", "Int_Hyli_AS", "Int_Hyli_S")

Int_violin <- ggplot(data = Int_matrix_data_formatted, aes(x = factor(piRNA_Origin,
  level = Int_level_order), y = piRNA_Mapping_Density), log = "y") + geom_violin(aes(fill = Transcript_Class,
  scale_y_log10(breaks = scales::trans_breaks("log10", function(x) 10^x), labels = scales::trans_format(
  scales::math_format(10^.x))))

Int_plot <- Int_violin + scale_fill_manual(values = c("red", "light blue", "grey",
  "green")) + theme(panel.grid.major = element_blank(), panel.grid.minor = element_blank(),
  panel.background = element_blank(), axis.line = element_line(colour = "black")) +
  theme(legend.text = element_text(size = rel(1))) + ggtitle("Interstitial piRNAs") +
  theme(plot.title = element_text(hjust = 0.5)) + xlab("piRNA Origin") + ylab("piRNA Mapping Density")

# Plot epithelial piRNA count density values

Epi_matrix_data <- count_matrix[, c(15:18, 14)]
Epi_matrix_data_formatted <- melt(Epi_matrix_data, id.var = "Transcript_Class")
colnames(Epi_matrix_data_formatted) <- c("Transcript_Class", "piRNA_Origin", "piRNA_Mapping_Density")
Epi_matrix_data_formatted$Transcript_Class <- factor(Epi_matrix_data_formatted$Transcript_Class,
  levels = c("TE", "ncRNA", "Unchar", "Gene"))
Epi_level_order <- c("Epi_Hywi_AS", "Epi_Hywi_S", "Epi_Hyli_AS", "Epi_Hyli_S")

Epi_violin <- ggplot(data = Epi_matrix_data_formatted, aes(x = factor(piRNA_Origin,
  level = Epi_level_order), y = piRNA_Mapping_Density), log = "y") + geom_violin(aes(fill = Transcript_Class,
  scale_y_log10(breaks = scales::trans_breaks("log10", function(x) 10^x), labels = scales::trans_format(
  scales::math_format(10^.x))))

Epi_plot <- Epi_violin + scale_fill_manual(values = c("red", "light blue", "grey",
  "green")) + theme(panel.grid.major = element_blank(), panel.grid.minor = element_blank(),
  panel.background = element_blank(), axis.line = element_line(colour = "black")) +
  theme(legend.text = element_text(size = rel(1))) + ggtitle("Epithelial piRNAs") +
  theme(plot.title = element_text(hjust = 0.5)) + xlab("piRNA Origin") + ylab("piRNA Mapping Density")

# Arrange
ggarrange(Epi_plot, Int_plot, ncol = 1, nrow = 2)

```

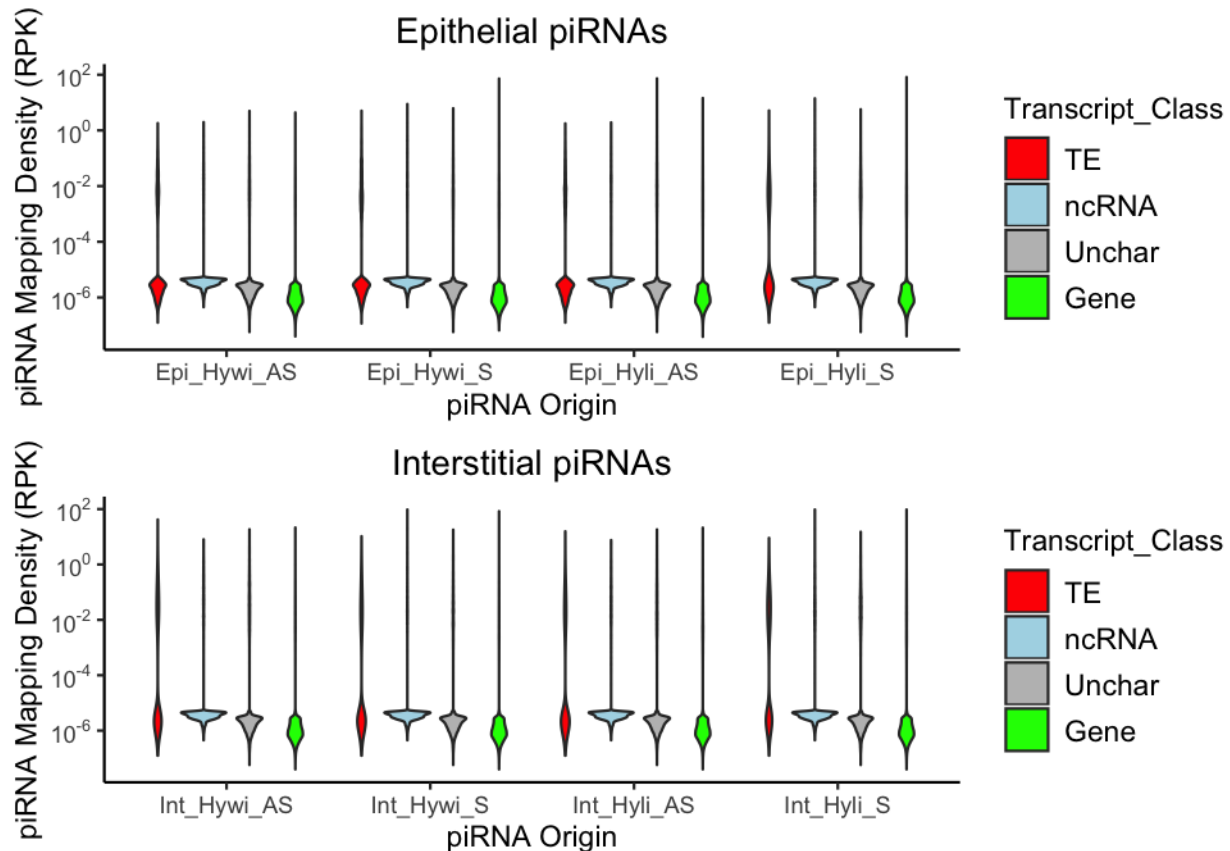

## Explore Lineage-sorted piRNA Diversity

To explore the diversity of piRNAs in different lineages, we identified unique piRNA sequences in each lineage as well as the piRNAs species that were present in multiple lineages.

Lineage-sorted unique sequence lists were generated from the lineage-sorted piRNA libraries generated previously. Each unique sequence was collapsed down to one representative sequence using the script, "unique\_sRNA\_piRNA\_gen\_separate.R" and run using the script, "run\_unique\_sRNA\_piRNA\_gen\_separate.sh."

Lineage-specific and shared Hywi and Hyli piRNAs were visualized using venn diagrams.

### Unique Hywi piRNA Sequences

```
# Load unique piRNA sequences sorted by lineage and protein origin

load("objects/Unduplicated_Ecto_Hywi_small_RNAs_crossref.Rda")
load("objects/Unduplicated_Endo_Hywi_small_RNAs_crossref.Rda")
load("objects/Unduplicated_Int_Hywi_small_RNAs_crossref.Rda")

# Visualize shared and unique piRNA species by lineage

Venn_Hywi <- list(Ectodermal_piRNAs = Ecto_Hywi$seq, Endodermal_piRNAs = Endo_Hywi$seq,
  Interstitial_piRNAs = Int_Hywi$seq)
```

```
venn.plot.hywi <- venn.diagram(Venn_Hywi, filename = NULL, fill = c("blue", "red",
"yellow"))
grid.draw(venn.plot.hywi)
```

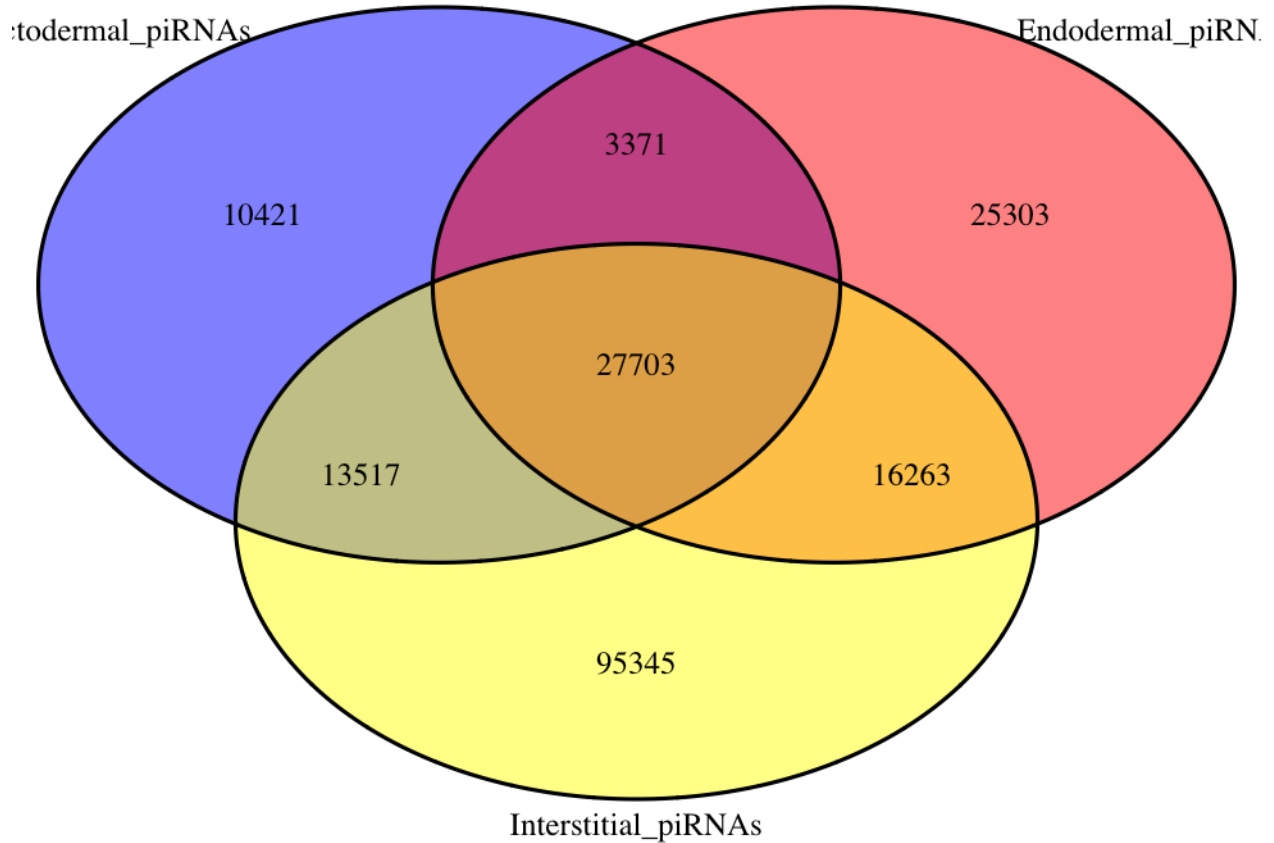

## Unique Hyli piRNA Sequences

```
load("objects/Unduplicated_Ecto_Hyli_small_RNAs_crossref.Rda")
load("objects/Unduplicated_Endo_Hyli_small_RNAs_crossref.Rda")
load("objects/Unduplicated_Int_Hyli_small_RNAs_crossref.Rda")

# Visualize shared and unique piRNA species by lineage

Venn_Hyli <- list(Ectodermal_piRNAs = Ecto_Hyli$seq, Endodermal_piRNAs = Endo_Hyli$seq,
Interstitial_piRNAs = Int_Hyli$seq)

venn.plot.hyli <- venn.diagram(Venn_Hyli, filename = NULL, fill = c("blue", "red",
"yellow"))
grid.draw(venn.plot.hyli)
```

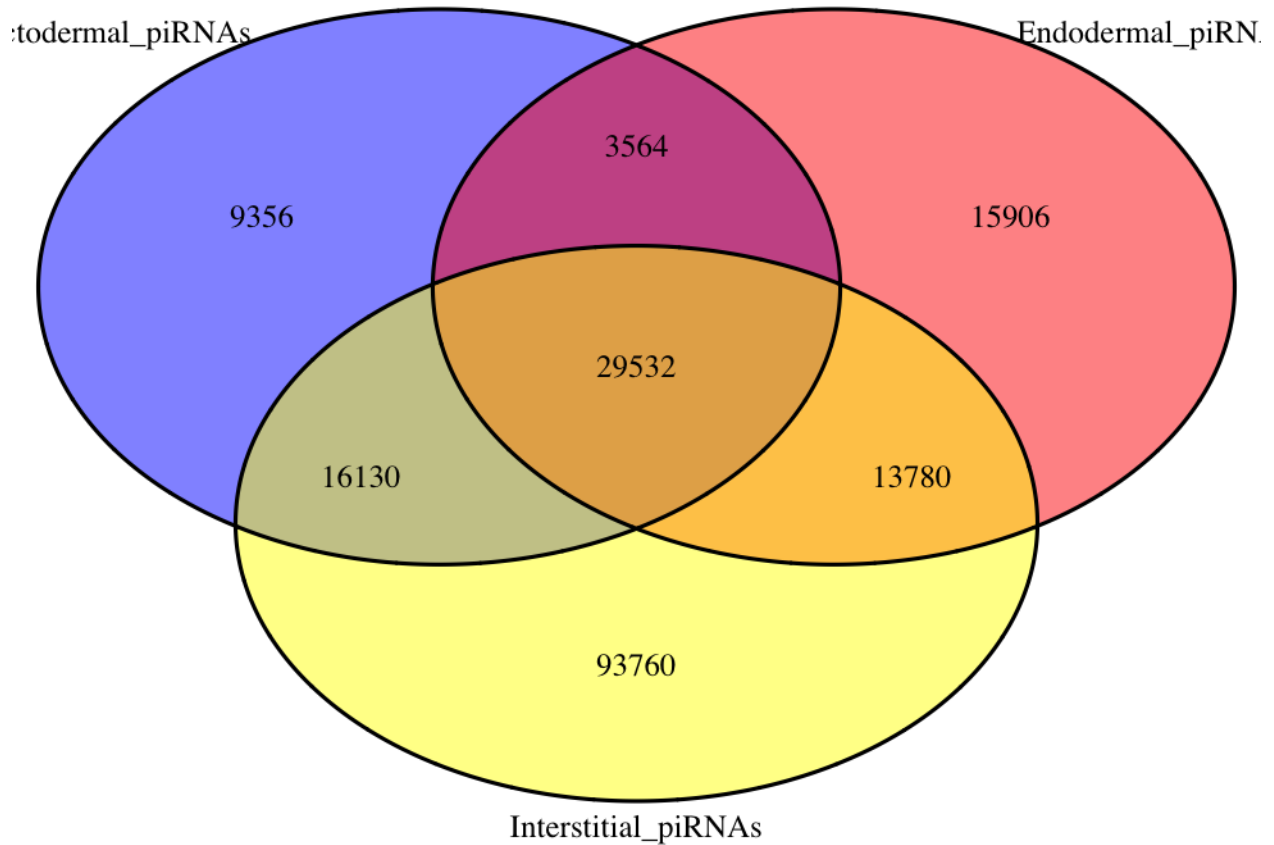

## Software versions

This document was computed on Fri Jan 10 10:47:23 2020 with the following R package versions.

R version 3.5.3 (2019-03-11)

Platform: x86\_64-apple-darwin15.6.0 (64-bit)

Running under: macOS Mojave 10.14.5

Matrix products: default

BLAS: /Library/Frameworks/R.framework/Versions/3.5/Resources/lib/libRblas.0.dylib

LAPACK: /Library/Frameworks/R.framework/Versions/3.5/Resources/lib/libRlapack.dylib

locale:

[1] en\_US.UTF-8/en\_US.UTF-8/en\_US.UTF-8/C/en\_US.UTF-8/en\_US.UTF-8

attached base packages:

[1] grid stats graphics grDevices utils datasets methods

[8] base

other attached packages:

[1] VennDiagram\_1.6.20 futile.logger\_1.4.3 ggpubr\_0.2.4

[4] magrittr\_1.5 ggplot2\_3.2.0 reshape2\_1.4.3

[7] dplyr\_0.8.3 knitr\_1.22

loaded via a namespace (and not attached):

|                       |                 |                      |
|-----------------------|-----------------|----------------------|
| [1] Rcpp_1.0.1        | pillar_1.4.2    | compiler_3.5.3       |
| [4] formatR_1.7       | plyr_1.8.4      | futile.options_1.0.1 |
| [7] tools_3.5.3       | digest_0.6.20   | evaluate_0.13        |
| [10] tibble_2.1.3     | gtable_0.3.0    | pkgconfig_2.0.2      |
| [13] rlang_0.4.0      | yaml_2.2.0      | xfun_0.5             |
| [16] withr_2.1.2      | stringr_1.4.0   | tidyselect_0.2.5     |
| [19] cowplot_0.9.4    | glue_1.3.1      | R6_2.4.0             |
| [22] rmarkdown_1.12   | purrr_0.3.2     | lambda.r_1.2.3       |
| [25] scales_1.0.0     | htmltools_0.3.6 | assertthat_0.2.1     |
| [28] colorspace_1.4-1 | ggsignif_0.5.0  | labeling_0.3         |
| [31] stringi_1.4.3    | lazyeval_0.2.2  | munsell_0.5.0        |
| [34] crayon_1.3.4     |                 |                      |



# 5 Single Cell Data Exploration

*Bryan Teefy*

*12/20/2019*

## Load required libraries

```
library(URD)
library(Seurat)
```

## Single Cell Data Exploration

We analyzed the homeostatic expression patterns of the 24 high mapping gene transcripts upregulated in response to hywi knockdown by interrogating single-cell expression data (Siebert, 2019). To interrogate expression, we used URD spline objects for ectoderm and endoderm. These objects contain expression data for genes that are expressed in at least 1% of the ectodermal or endodermal epithelial cells. We found epithelial expression for 16 of the 24 putative gene targets: 1) 13 gene transcripts are expressed in both the endodermal and ectodermal epithelial lineages, 2) one transcript is expressed only in the ectodermal epithelial lineage, and 3) two transcripts are expressed only in the endodermal epithelial lineage. No epithelial expression was found for 8 of the gene transcripts, which could indicate low expression in a homeostatic animal. Higher expression at the extremities in both the ectoderm and endoderm and lower expression in body regions would be consistent with Hywi-mediated repression. Putative targets could show high expression. The gene, t14391, shows such a pattern.

## Load the Necessary Files

```
# Load the list of searchable high mapping genes for each lineage

endo_mappers <- read.table("objects/Endodermal_High_Mappers.txt", header = F)
colnames(endo_mappers) <- "ID"

ecto_mappers <- read.table("objects/Ectodermal_High_Mappers.txt", header = F)
colnames(ecto_mappers) <- "ID"

# Load the seurat object to load the searchable transcript IDs The seurat object
# (file Hydra_Seurat_Whole_Transcriptome) can be downloaded from Dryad:
# https://doi.org/10.5061/dryad.v5r6077. After download, place in the 'objects'
# folder

Hydra_Object <- readRDS("objects/Hydra_Seurat_Whole_Transcriptome.rds")

# Load single cell pseudotime objects (spline objects) and High Mapping Gene List
# The spline objects (file Hydra_URD_analysis_objects) can be downloaded from
# Dryad: https://doi.org/10.5061/dryad.v5r6077. After download, place in the
# 'objects' folder
```

```
endoderm.splines <- readRDS("objects/Splines-Endoderm.rds")
ectoderm.splines <- readRDS("objects/Splines-Ectoderm.rds")
```

## Data Exploration

```
# Establish hFind function to return the searchable transcript IDs

hFind <- function(x) {
  return(Hydra_Object@data@Dimnames[[1]][grep(x, Hydra_Object@data@Dimnames[[1]],
    ignore.case = T)])
}

# Run hFind function to convert to searchable transcript IDs

endo_mappers$ID <- sapply(endo_mappers$ID, FUN = hFind)

ecto_mappers$ID <- sapply(ecto_mappers$ID, FUN = hFind)

# Generate Endodermal and Endodermal Plots

plotSmoothFitMultiCascade(endoderm.splines, genes = endo_mappers$ID[1:7], scaled = F,
  colors = c(`Foot/Body` = "#FF8C00", Tentacle = "#1E90FF", Hypostome = "#32CD32"),
  ncol = 1)
```

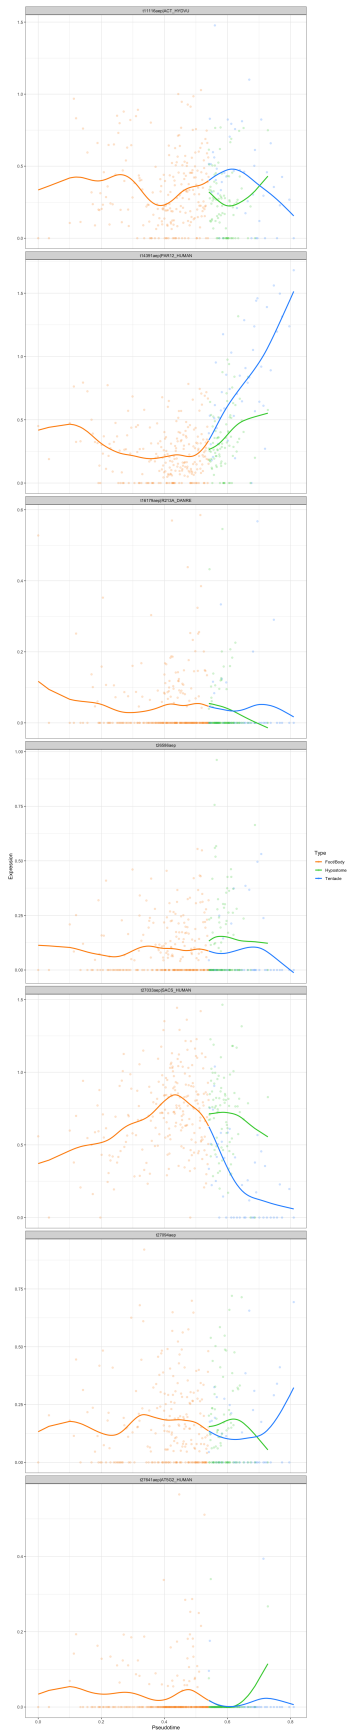

```
plotSmoothFitMultiCascade(endoderm.splines, genes = endo_mappers$ID[8:15], scaled = F,  
  colors = c(`Foot/Body` = "#FF8C00", Tentacle = "#1E90FF", Hypostome = "#32CD32"),  
  ncol = 1)
```



```
plotSmoothFitMultiCascade(ectoderm.splines, genes = ecto_mappers$ID[1:6], scaled = F,  
  colors = c(`Basal Disc` = "#FF8C00", `Body Column` = "#000000", Tentacle = "#1E90FF",  
  Hypostome = "#32CD32"), ncol = 1)
```

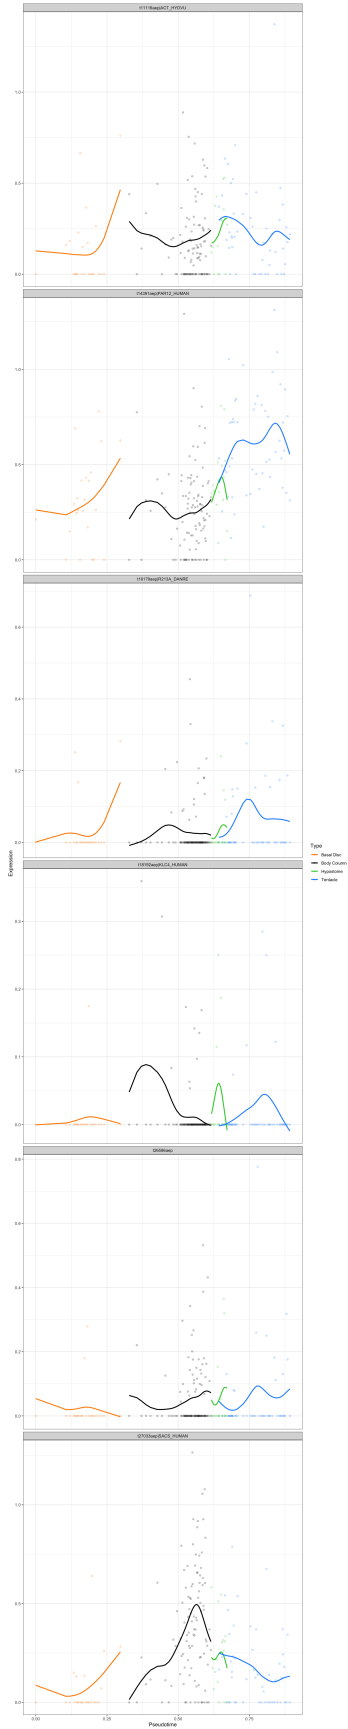

```
plotSmoothFitMultiCascade(ectoderm.splines, genes = ecto_mappers$ID[7:14], scaled = F,  
  colors = c(`Basal Disc` = "#FF8C00", `Body Column` = "#000000", Tentacle = "#1E90FF",  
  Hypostome = "#32CD32"), ncol = 1)
```



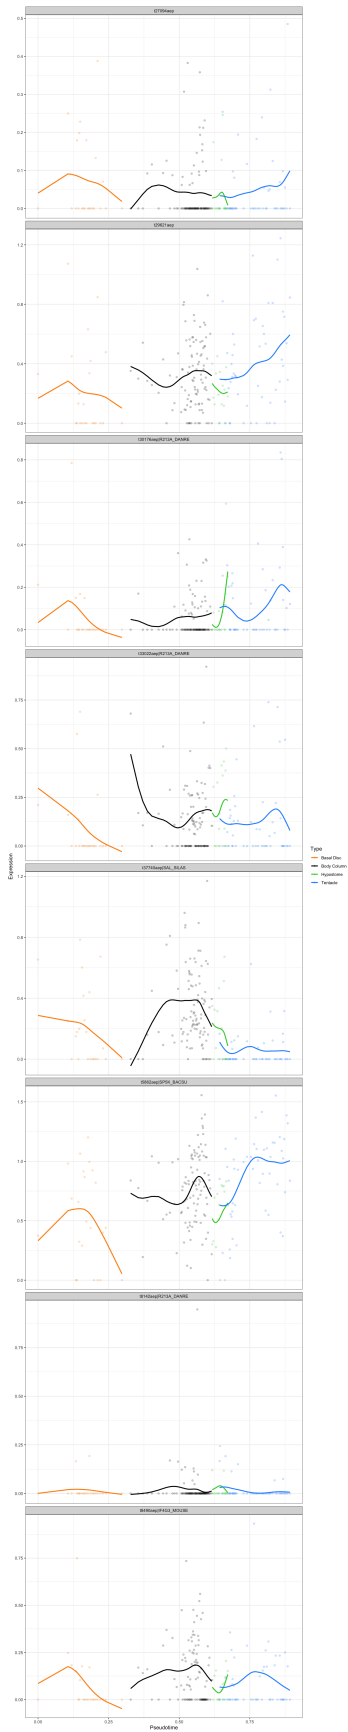

## Software versions

This document was computed on Thu Jan 09 15:24:08 2020 with the following R package versions.

R version 3.5.3 (2019-03-11)  
Platform: x86\_64-apple-darwin15.6.0 (64-bit)  
Running under: macOS Mojave 10.14.5

Matrix products: default  
BLAS: /Library/Frameworks/R.framework/Versions/3.5/Resources/lib/libRblas.0.dylib  
LAPACK: /Library/Frameworks/R.framework/Versions/3.5/Resources/lib/libRlapack.dylib

locale:  
[1] en\_US.UTF-8/en\_US.UTF-8/en\_US.UTF-8/C/en\_US.UTF-8/en\_US.UTF-8

attached base packages:  
[1] stats graphics grDevices utils datasets methods base

other attached packages:  
[1] Seurat\_2.3.4 cowplot\_0.9.4 URD\_1.0.3 Matrix\_1.2-16 ggplot2\_3.2.0  
[6] knitr\_1.22

loaded via a namespace (and not attached):  
[1] reticulate\_1.11.1 R.utils\_2.8.0  
[3] tidyselect\_0.2.5 htmlwidgets\_1.3  
[5] grid\_3.5.3 trimcluster\_0.1-2.1  
[7] ranger\_0.11.2 BiocParallel\_1.14.2  
[9] Rtsne\_0.15 munsell\_0.5.0  
[11] destiny\_2.10.2 codetools\_0.2-16  
[13] ica\_1.0-2 withr\_2.1.2  
[15] colorspace\_1.4-1 Biobase\_2.40.0  
[17] rstudioapi\_0.9.0 stats4\_3.5.3  
[19] ROCR\_1.0-7 robustbase\_0.93-3  
[21] dtw\_1.20-1 vcd\_1.4-4  
[23] VIM\_4.8.0 TTR\_0.23-4  
[25] gbRd\_0.4-11 labeling\_0.3  
[27] Rdpack\_0.10-1 lars\_1.2  
[29] GenomeInfoDbData\_1.1.0 polyclip\_1.10-0  
[31] bit64\_0.9-7 farver\_1.1.0  
[33] xfun\_0.5 ggthemes\_4.2.0  
[35] diptest\_0.75-7 R6\_2.4.0  
[37] GenomeInfoDb\_1.16.0 RcppEigen\_0.3.3.5.0  
[39] hdf5r\_1.0.1 flexmix\_2.3-15  
[41] bitops\_1.0-6 DelayedArray\_0.6.6  
[43] assertthat\_0.2.1 SDMTools\_1.1-221  
[45] scales\_1.0.0 ggraph\_1.0.2  
[47] nnet\_7.3-12 gtable\_0.3.0  
[49] npsurv\_0.4-0 rlang\_0.4.0  
[51] scatterplot3d\_0.3-41 splines\_3.5.3  
[53] lazyeval\_0.2.2 acepack\_1.4.1  
[55] checkmate\_1.9.1 yaml\_2.2.0  
[57] reshape2\_1.4.3 abind\_1.4-5  
[59] backports\_1.1.4 Hmisc\_4.2-0

|       |                      |                             |
|-------|----------------------|-----------------------------|
| [61]  | tools_3.5.3          | gplots_3.0.1.1              |
| [63]  | RColorBrewer_1.1-2   | proxy_0.4-23                |
| [65]  | BiocGenerics_0.26.0  | ggribes_0.5.1               |
| [67]  | Rcpp_1.0.1           | plyr_1.8.4                  |
| [69]  | base64enc_0.1-3      | zlibbioc_1.26.0             |
| [71]  | purrr_0.3.2          | RCurl_1.95-4.12             |
| [73]  | rpart_4.1-13         | pbapply_1.4-0               |
| [75]  | viridis_0.5.1        | S4Vectors_0.18.3            |
| [77]  | zoo_1.8-4            | SummarizedExperiment_1.10.1 |
| [79]  | haven_2.1.0          | ggrepel_0.8.1               |
| [81]  | cluster_2.0.7-1      | magrittr_1.5                |
| [83]  | data.table_1.12.2    | openxlsx_4.1.0.1            |
| [85]  | gmodels_2.18.1       | lmtest_0.9-36               |
| [87]  | RANN_2.6.1           | mvtnorm_1.0-10              |
| [89]  | fitdistrplus_1.0-14  | matrixStats_0.54.0          |
| [91]  | hms_0.4.2            | lsei_1.2-0                  |
| [93]  | evaluate_0.13        | smoother_1.1                |
| [95]  | rio_0.5.16           | mclust_5.4.2                |
| [97]  | readxl_1.3.1         | IRanges_2.14.12             |
| [99]  | gridExtra_2.3        | compiler_3.5.3              |
| [101] | tibble_2.1.3         | KernSmooth_2.23-15          |
| [103] | crayon_1.3.4         | R.oo_1.22.0                 |
| [105] | htmltools_0.3.6      | segmented_0.5-3.0           |
| [107] | Formula_1.2-3        | snow_0.4-3                  |
| [109] | tidyr_0.8.3          | tweenr_1.0.1                |
| [111] | formatR_1.7          | MASS_7.3-51.1               |
| [113] | fpc_2.1-11.1         | boot_1.3-20                 |
| [115] | car_3.0-3            | R.methodsS3_1.7.1           |
| [117] | gdata_2.18.0         | parallel_3.5.3              |
| [119] | metap_1.1            | igraph_1.2.4.1              |
| [121] | GenomicRanges_1.32.7 | forcats_0.4.0               |
| [123] | pkgconfig_2.0.2      | foreign_0.8-71              |
| [125] | laeken_0.5.0         | sp_1.3-1                    |
| [127] | foreach_1.4.4        | XVector_0.20.0              |
| [129] | minpack.lm_1.2-1     | bibtex_0.4.2                |
| [131] | stringr_1.4.0        | digest_0.6.20               |
| [133] | tsne_0.1-3           | rmarkdown_1.12              |
| [135] | cellranger_1.1.0     | htmlTable_1.13.1            |
| [137] | curl_3.3             | kernlab_0.9-27              |
| [139] | gtools_3.8.1         | modeltools_0.2-22           |
| [141] | jsonlite_1.6         | nlme_3.1-137                |
| [143] | carData_3.0-2        | viridisLite_0.3.0           |
| [145] | pillar_1.4.2         | lattice_0.20-38             |
| [147] | httr_1.4.0           | DEoptimR_1.0-8              |
| [149] | survival_2.43-3      | glue_1.3.1                  |
| [151] | xts_0.11-2           | zip_2.0.3                   |
| [153] | png_0.1-7            | prabclus_2.2-7              |
| [155] | iterators_1.0.10     | bit_1.1-14                  |
| [157] | ggforce_0.2.2        | class_7.3-15                |
| [159] | stringi_1.4.3        | mixtools_1.1.0              |
| [161] | doSNOW_1.0.16        | latticeExtra_0.6-28         |
| [163] | caTools_1.17.1.2     | dplyr_0.8.3                 |
| [165] | irlba_2.3.3          | e1071_1.7-2                 |
| [167] | ape_5.2              |                             |
